# Supplementary material for: Histone lactylation enhances GCLC expression and thus promotes chemoresistance of colorectal cancer stem cells through inhibiting ferroptosis
Source: Springer Nature journal article supplement (doi:10.1038/s41419-025-07498-z), 2025-03-20
Supplement: MOESM1 [file 41419_2025_7498_MOESM1_ESM.pdf]

## **Extended data**

### **Supplementary Figure legend**

#### **Supplemental Figure 1. Lactylation mediates CRC tumor development, related to Figure 1.**

(A) Gene set enrichment analysis (GSEA) of TCGA-COAD dataset was performed to evaluate changes in glycolysis in CRC tumors and normal specimens. ES = 0.3875, NP=0.0316. (B) Immunohistochemical (IHC) staining was used to assess lactylation levels in a tissue microarray. (C) Western blotting was used to assess the expression of Pan K1a in tumor and normal specimens; T, tumor; N, normal. (D) The UMAP plot of clustered single-cell RNA-seq datasets demonstrates the existence of distinct CRC tumor subpopulations. The cells were clustered into eight different groups, with each cell cluster labeled and colored according to its subcellular type. (E) Western blot analysis was performed to assess the expression of CD133, Pan-K1a, Nanog, and OCT4 in CRC sphere and adherent cells. (F) Western blot was used to assess the expression of H4K121a in tumor and normal specimens; T, tumor; N, normal. (G) A schematic diagram illustrating sphere cell sorting. (H) Western blot analysis was performed to evaluate the expression of CD133, Pan K1a, Nanog and H4K121a in CD133<sup>-</sup> and CD133<sup>+</sup> cells.

#### **Supplemental Figure 2. Lactate regulates the histone lactylation and stemness of CCSCs.**

(A) Western blot analysis was performed to determine the expression of CD133, Nanog, Pan K1a, and H4K121a in SW-620 CSCs treated with lactate for 24 hours. (B) Western blot analysis was performed to evaluate the expression of CD133, Nanog, Pan K1a, and H4K121a in SW-620 CSCs treated with NALA for 24 hours. (C) Western blot analysis was performed to assess the expression of CD133, Nanog, Pan K1a, and H4K121a in

SW-620 CSCs cultured in regular medium containing varying concentrations of glucose for 24 hours; Right: Intracellular lactate levels were measured. **(D)** IF staining was performed to observe H4K12la (red) in LoVo cells treated with lactate for 24 hours. Scale bar: 100  $\mu$ m. **(E)** HCT-116 CSCs were exposed to 2-DG for 24 hours. Left: Western blot analysis was used to assess the expression of CD133, Nanog, Pan K1a, and H4K12la; Right: Intracellular lactate levels were measured. **(F)** SW-620 CSCs were cultured under hypoxic conditions for different durations. Left: Western blot analysis was used to assess the expression of CD133, Nanog, Pan K1a, and H4K12la; Right: Intracellular lactate levels were measured. **(G)** The expression of LDHA was analyzed in the TCGA-COAD and TCGA-READ datasets (normal=51, tumor=647). **(H)** Kaplan-Meier overall survival analysis of LDHA expression in the public colorectal cancer dataset (GSE17536) (n=177, Cox regression analysis).  $p < 0.001$ .

**Supplemental Figure 3. p300 is an H4K12la lactylase and HDAC1 is an H4K12la delactylase.**

**(A)** Western blot analysis was used to evaluate the expression of p300, CD133, Pan-K1a, Nanog, Pan Ac, and H4K12la in siP300 SW-620 CSCs. **(B)** IF assay was performed to assess the expression of H4K12la and Pan Ac in siP300 SW-620 CSCs. Scale bar: 200  $\mu$ m. **(C)** Western blot analysis was used to evaluate the expression of HDAC1, CD133, Pan-K1a, SOX2, Pan Ac, and H4K12la in shHDAC1 HCT-116 CSCs. **(D)** IF assay was performed to assess the expression of H4K12la and Pan Ac in shHDAC1 HCT-116 CSCs. Scale bar: 100  $\mu$ m. **(E)** Western blot analysis was used to assess the expression of CD133, Pan K1a, Nanog, Pan Ac, and H4K12la in LoVo and SW-620 CSCs cultured in regular medium containing TSA for 24 hours. **(F)** Western blot analysis was used to assess the expression of CD133, Pan K1a, Nanog, Pan Ac, and

H4K12la in HCT-116 CSCs overexpressing HDAC1.

**Supplemental Figure 4. Inhibition of lactylation makes CCSCs responsive to chemotherapeutic agents, related to Figure 4.**

(A) Cell viability was assessed in SW-620 and LoVo CSCs treated with glucose and oxaliplatin for 24 hours. (B) Representative immunohistochemical images of H4K12la and Ki67 in tumor sections are shown. Scale bar, 50  $\mu$ m. (C) Representative images of immunohistochemical staining for H4K12la and Ki67 in tumor sections. Scale bar, 50  $\mu$ m. Three biological replicates were shown. The presented data shown represent the mean  $\pm$  SD. Statistical analyses were performed using the Student's t-test.  $*p < 0.05$ ,  $**p < 0.01$ .

**Supplemental Figure 5. Ferroptosis in CCSCs is inhibited by histones lactylation.**

(A) Cluster analysis of RNA expression levels in LoVo CSCs treated with oxaliplatin or oxaliplatin plus lactate. (B) KEGG enrichment analysis was conducted to identify the 20 most enriched KEGG terms, including ferroptosis. (C and D) Relative lipid ROS and MDA levels were tested in SW-620 CSCs treated with RSL3 (5  $\mu$ M) or Erastin (5  $\mu$ M) or oxaliplatin (5  $\mu$ M) for 12 hours (n=3). (E and F) Relative levels of lipid ROS and MDA were measured in SW-620 CSCs treated with oxaliplatin (5  $\mu$ M) and lactate for 12 hours (n=3). (G and H) Relative levels of lipid ROS and MDA were measured in LoVo CSCs treated with oxaliplatin (5  $\mu$ M) and NALA for 12 hours (n=3). (I and J) Relative levels of lipid ROS and MDA were tested in SW-620 CSCs treated with oxaliplatin (5  $\mu$ M) and NALA for 12 hours (n=3). (K and L) Relative levels of lipid ROS and MDA in were measured HCT-116 CSCs treated with oxaliplatin (5 $\mu$ M) and 2-DG for 12 hours (n=3). Three biological replicates were shown. The presented data show the mean  $\pm$  SD; Comparisons were conducted using one-way ANOVA with

Tukey's test.  $*p < 0.05$ ,  $**p < 0.01$ ,  $***p < 0.001$ . ns indicates no significant difference.

**Supplemental Figure 6. Ferroptosis is inhibited by histone lactylation in CSCs.**

(A and B) Relative levels of lipid ROS and MDA were measured in shLDHA SW-620 CSCs treated with oxaliplatin (5  $\mu$ M) for 12 hours (n=3). (C and D) Relative levels of lipid ROS and MDA were measured in siP300 SW-620 CSCs treated with oxaliplatin (5  $\mu$ M) for 12 hours (n=3). (E and F) Relative levels of lipid ROS and MDA were measured in shHDAC1 HCT-116 CSCs treated with oxaliplatin (5  $\mu$ M) for 12 hours (n=3). Three biological replicates were shown. The presented data show the mean  $\pm$  SD; Comparisons were conducted using one-way ANOVA with Tukey's tes.  $*p < 0.05$ ,  $**p < 0.01$ ,  $***p < 0.001$ .

**Supplemental Figure 7. Expression of GCLC is transcriptionally activated by histone lactation.**

(A) The H4K12la modification is primarily enriched at the TSS. (B) Genome-wide distribution of H4K12la- associated peaks in LoVo CSCs. (C) GCLC expression was analyzed in TCGA-COAD and TCGA-READ datasets: normal = 51, tumor = 647;  $***p < 0.001$ . (D) CUT&Tag-qPCR assay was used to analyze H4K12la in the GCLC genomic region of SW-620 CSCs. (E) Quantitative real-time PCR (qPCR) analysis of GCLC mRNA levels in LoVo and SW-620 CSCs cultured in regular medium containing NALA for 24 hours (n=3). (F) Western blot analysis was used to assess GCLC expression in LoVo and SW-620 CSCs cultured in regular medium containing NALA for 24 hours. (G) qPCR analysis of GCLC mRNA levels in siP300 LoVo and SW-620 CSCs. (H) Western blot analysis was performed to assess GCLC expression in siP300 LoVo and SW-620 CSCs. (I) qPCR analysis of GCLC mRNA levels in shLDHA LoVo and SW-620 CSCs. (J) Western blot analysis was performed to assess GCLC expression

in shLDHA LoVo and SW-620 CSCs. (K) qPCR analysis of GCLC mRNA levels in LoVo and SW-620 CSCs cultured in regular medium containing oxamate for 24 hours. (L) Western blot analysis was used to assess GCLC expression in LoVo and SW-620 CSCs cultured in regular medium containing oxamate for 24 hours. (M) Gene expression correlation between GCLC and EP300 in TCGA-COAD and TCGA-READ datasets (n =647);  $R = 0.303$ ,  $p < 0.001$ . (N) Gene expression correlation between GCLC and LDHA in TCGA-COAD and TCGA-READ datasets (n=647);  $R = 0.266$ ,  $p < 0.001$ .

**Supplemental Figure 8. Histone lactylation defends against ferroptosis.**

(A) Western blot was performed to examine the expression of Pan K1a, H4K12la, GCLC, and GPX4 in SW-620 CSCs. The cells were treated with NALA (10  $\mu$ M) or Ferr-1 (1  $\mu$ M) along with oxaliplatin (5  $\mu$ M). (B and C) Relative lipid ROS and MDA levels were tested in SW-620 CSCs treated with NALA (10  $\mu$ M) or Ferr-1 (1  $\mu$ M) along with oxaliplatin (5  $\mu$ M) for 12 hours. (D) Western blot of Pan K1a, H4K12la, GCLC, and GPX4 in SW-620 CSCs treated with NALA (10  $\mu$ M) or Ferr-1 (1  $\mu$ M) along with oxaliplatin (5  $\mu$ M). (E and F) Relative lipid ROS and MDA levels were evaluated in SW-620 CSCs treated with 2-DG (10  $\mu$ M) and/or Ferr-1 (1  $\mu$ M) along with oxaliplatin (5  $\mu$ M) treatment for 12 hours. Three biological replicates were shown. The presented data show the mean  $\pm$  SD. Comparisons were conducted using one-way ANOVA with Tukey's test. \* $p < 0.05$ , \*\* $p < 0.01$ , \*\*\* $p < 0.001$ . ns indicates no significant difference.

**Supplemental Figure 9. Inhibition of histone Lactylation suppresses GCLC function.**

(A) Western blot analysis was used to assess the expression of GCLC, Pan K1a, H4K12la, and GPX4 in HCT-116 CSCs overexpressing GCLC and treated with

oxamate (10 mM). **(B and C)** Relative lipid ROS and MDA levels were assayed in HCT-116 CSCs overexpressing GCLC and treated with oxamate (10 mM) and oxaliplatin (5  $\mu$ M) for 12 hours. **(D)** Western blot analysis was used to assess the expression of GCLC, Pan K1a, H4K121a, and GPX4 in HCT-116 CSCs overexpressed GCLC and treated with 2-DG (10  $\mu$ M). **(E and F)** Relative lipid ROS and MDA levels were examined in HCT-116 CSCs overexpressed GCLC and treated with 2-DG (10  $\mu$ M) plus oxaliplatin (5  $\mu$ M) for 12 hours. **(G)** Western blot analysis was used to assess the expression of GCLC, Pan K1a, H4K121a, and GPX4 in LoVo CSCs overexpressing GCLC treated with or without 2-DG (10  $\mu$ M). **(H and I)** Relative lipid ROS and MDA levels were tested in LoVo CSCs overexpressing GCLC and treated with or without 2-DG (10  $\mu$ M). Cells were treated with oxaliplatin (5  $\mu$ M) for 12 hours to induce ferroptosis. Three biological replicates were shown. The data represent the mean  $\pm$  SD. Comparisons were conducted using one-way ANOVA with Tukey's test. \* $p$  < 0.05, \*\* $p$  < 0.01, \*\*\* $p$  < 0.001, \*\*\*\* $p$  < 0.0001.

**Supplemental Figure 10. Histone lactylation inhibits ferroptosis through GCLC.**

**(A)** Western blot analysis was used to assess the expression of GCLC, Pan K1a, H4K121a, and GPX4 in HCT-116 CSCs treated with NALA (10  $\mu$ M) or BSO (200  $\mu$ M). **(B and C)** Relative lipid ROS and MDA levels were measured in HCT-116 CSCs treated with oxaliplatin (5  $\mu$ M) for 12 hours. **(D)** Western blot analysis was used to assess the expression of GCLC, Pan K1a, H4K121a, and GPX4 in shGCLC LoVo CSCs. **(E and F)** Relative lipid ROS and MDA levels were measured in LoVo CSCs treated with oxaliplatin (5  $\mu$ M) for 12 hours. **(G)** Western blot analysis was performed to assess the expression of GCLC, Pan K1a, H4K121a, and GPX4 in shGCLC HCT-116 CSCs. **(H and I)** Relative lipid ROS and MDA levels were measured in HCT-116 CSCs treated

with oxaliplatin (5  $\mu$ M) for 12 hours. **(J)** Limiting dilution assay (LDA) was performed for sphere cells injected subcutaneously into nude mice to determine tumor-initiating frequency (TIF). TIF, tumor-initiating frequency. Tumors were harvested at 42 days post implantation and represented images were taken **(J)**, **(K)** tumor weights and **(L)** tumor volumes were measured in mice injected with 10,000 cells. Three biological replicates were shown. The data shown represent the mean  $\pm$  SD. Comparisons were conducted using one-way ANOVA with Tukey's test.  $*p < 0.05$ ,  $**p < 0.01$ ,  $***p < 0.001$ , ns indicates no significant difference.

**Supplemental Figure 11. Enhanced chemosensitivity of drug-resistant CSCs by targeting GCLC.**

**(A and B)** Cell survival was evaluated in resistant and sensitive SW-620 and LoVo CSCs treated with oxaliplatin for 24 hours. **(C and D)** Relative lipid ROS and MDA levels were examined in SW-620 CSCs treated with oxaliplatin (5  $\mu$ M) for 12 hours. **(E)** Relative lipid ROS and MDA levels were evaluated in SW-620 and LoVo CSCs treated with oxaliplatin (5  $\mu$ M) for 12 hours. **(F)** Relative lipid ROS and MDA levels were tested in LoVo CSCs treated with oxaliplatin (5  $\mu$ M) for 12 hours. **(G and H)** Cell survival was evaluated in the resistant LoVo and SW-620 CSCs treated with oxaliplatin and/or BSO for 24 hours. **(I and J)** Cell survival was evaluated in resistant LoVo and SW-620 CSCs treated with BSO and oxaliplatin for 24 hours. Three biological replicates were shown. The data shown represent the mean  $\pm$  SD. Comparisons were conducted using two-way ANOVA with Tukey's test and Student's two-tailed t-test.  $**p < 0.01$ ,  $***p < 0.001$ ,  $****p < 0.0001$ .

Supplemental Fig.1

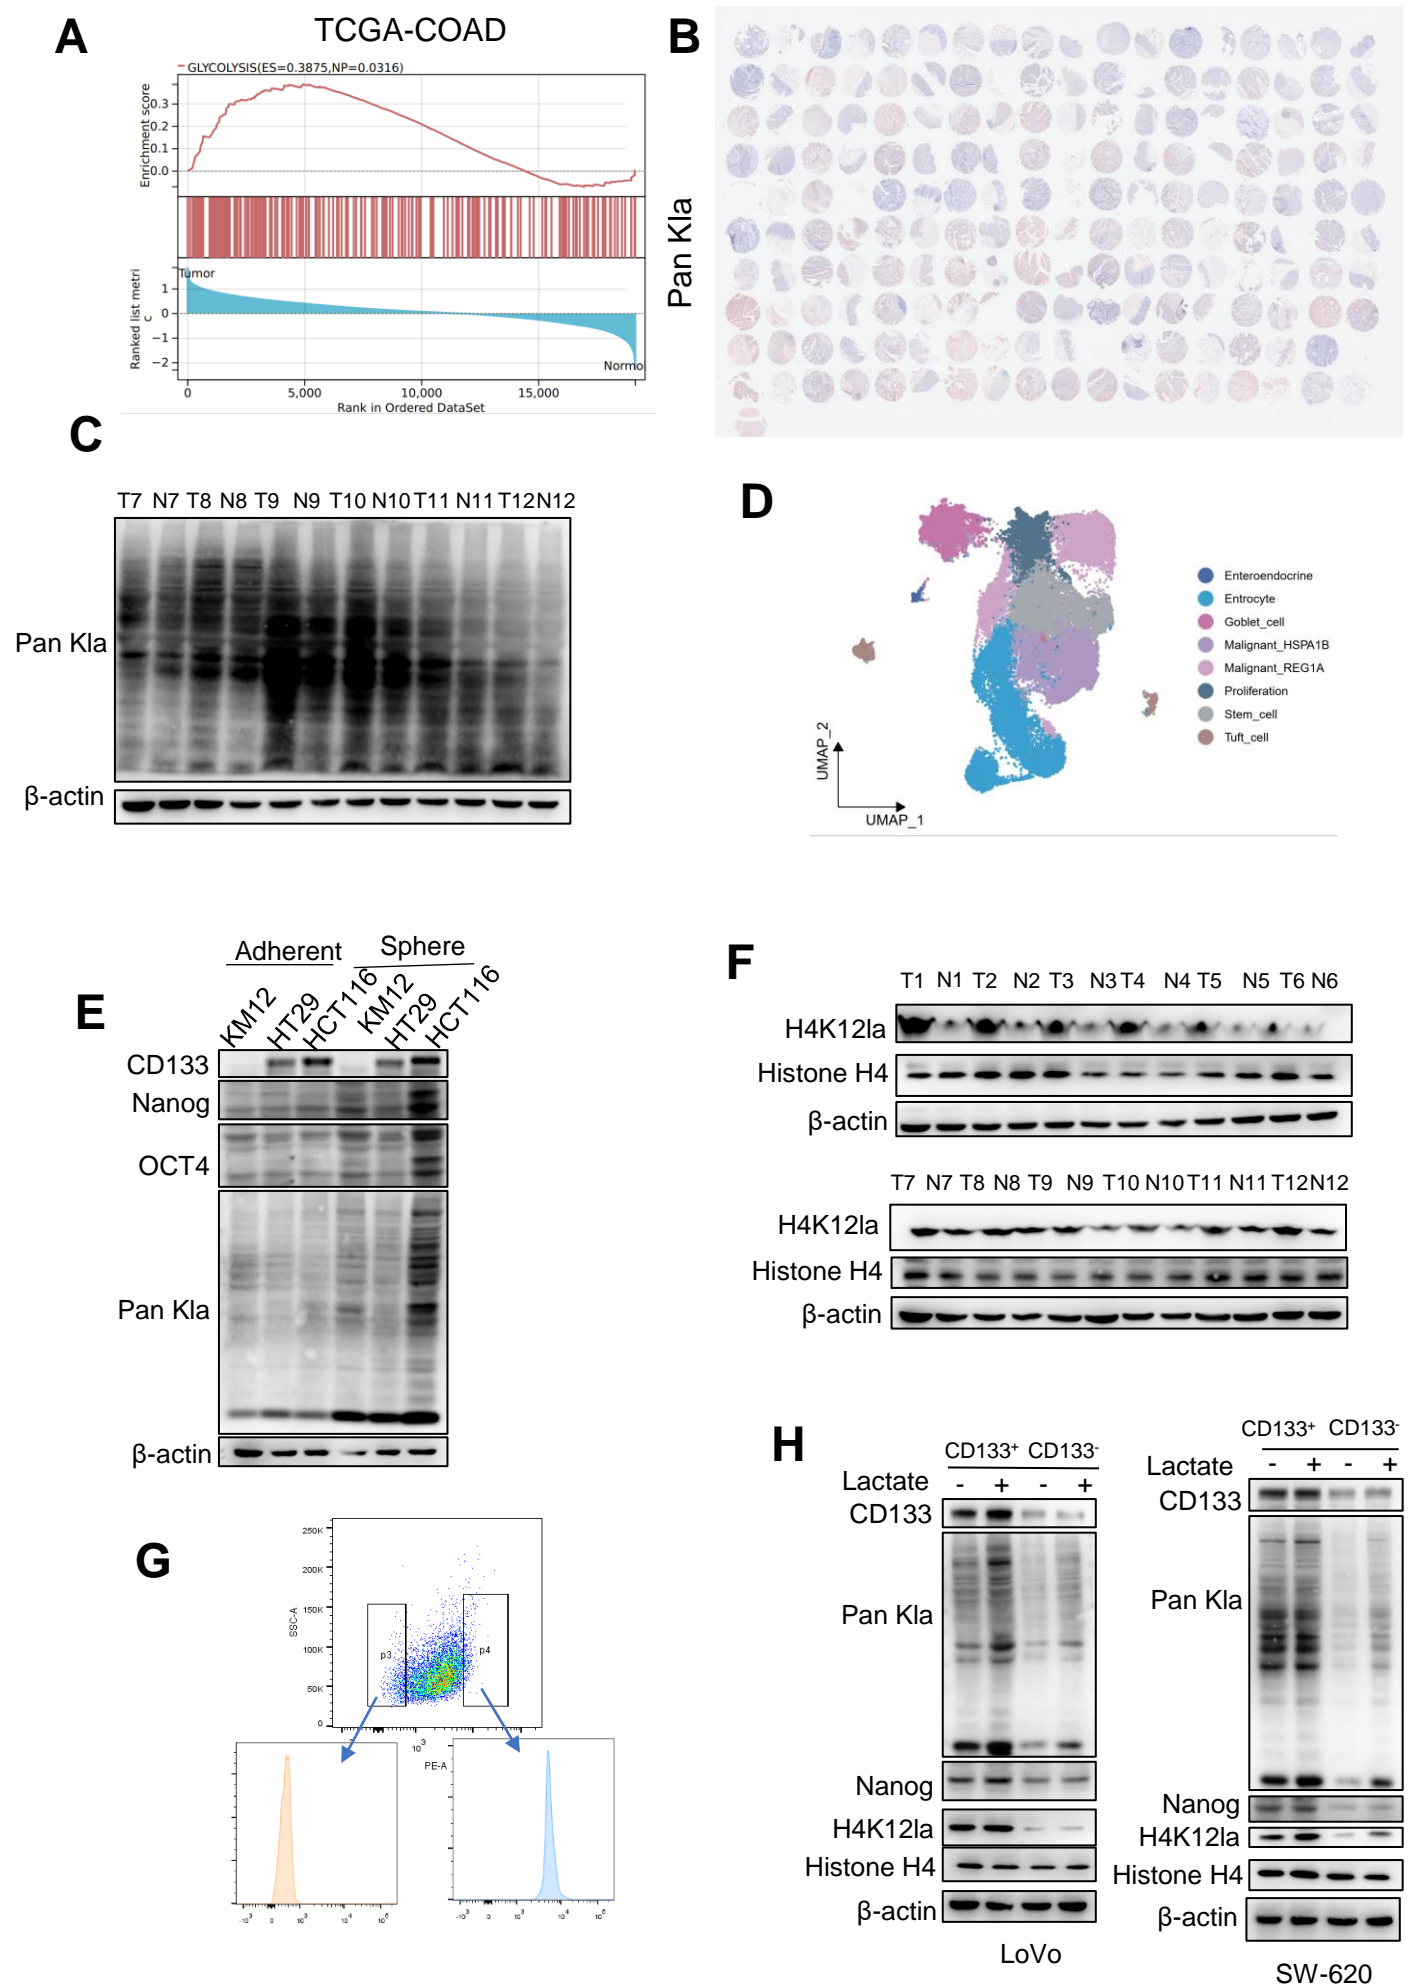



# Supplemental Fig. 2

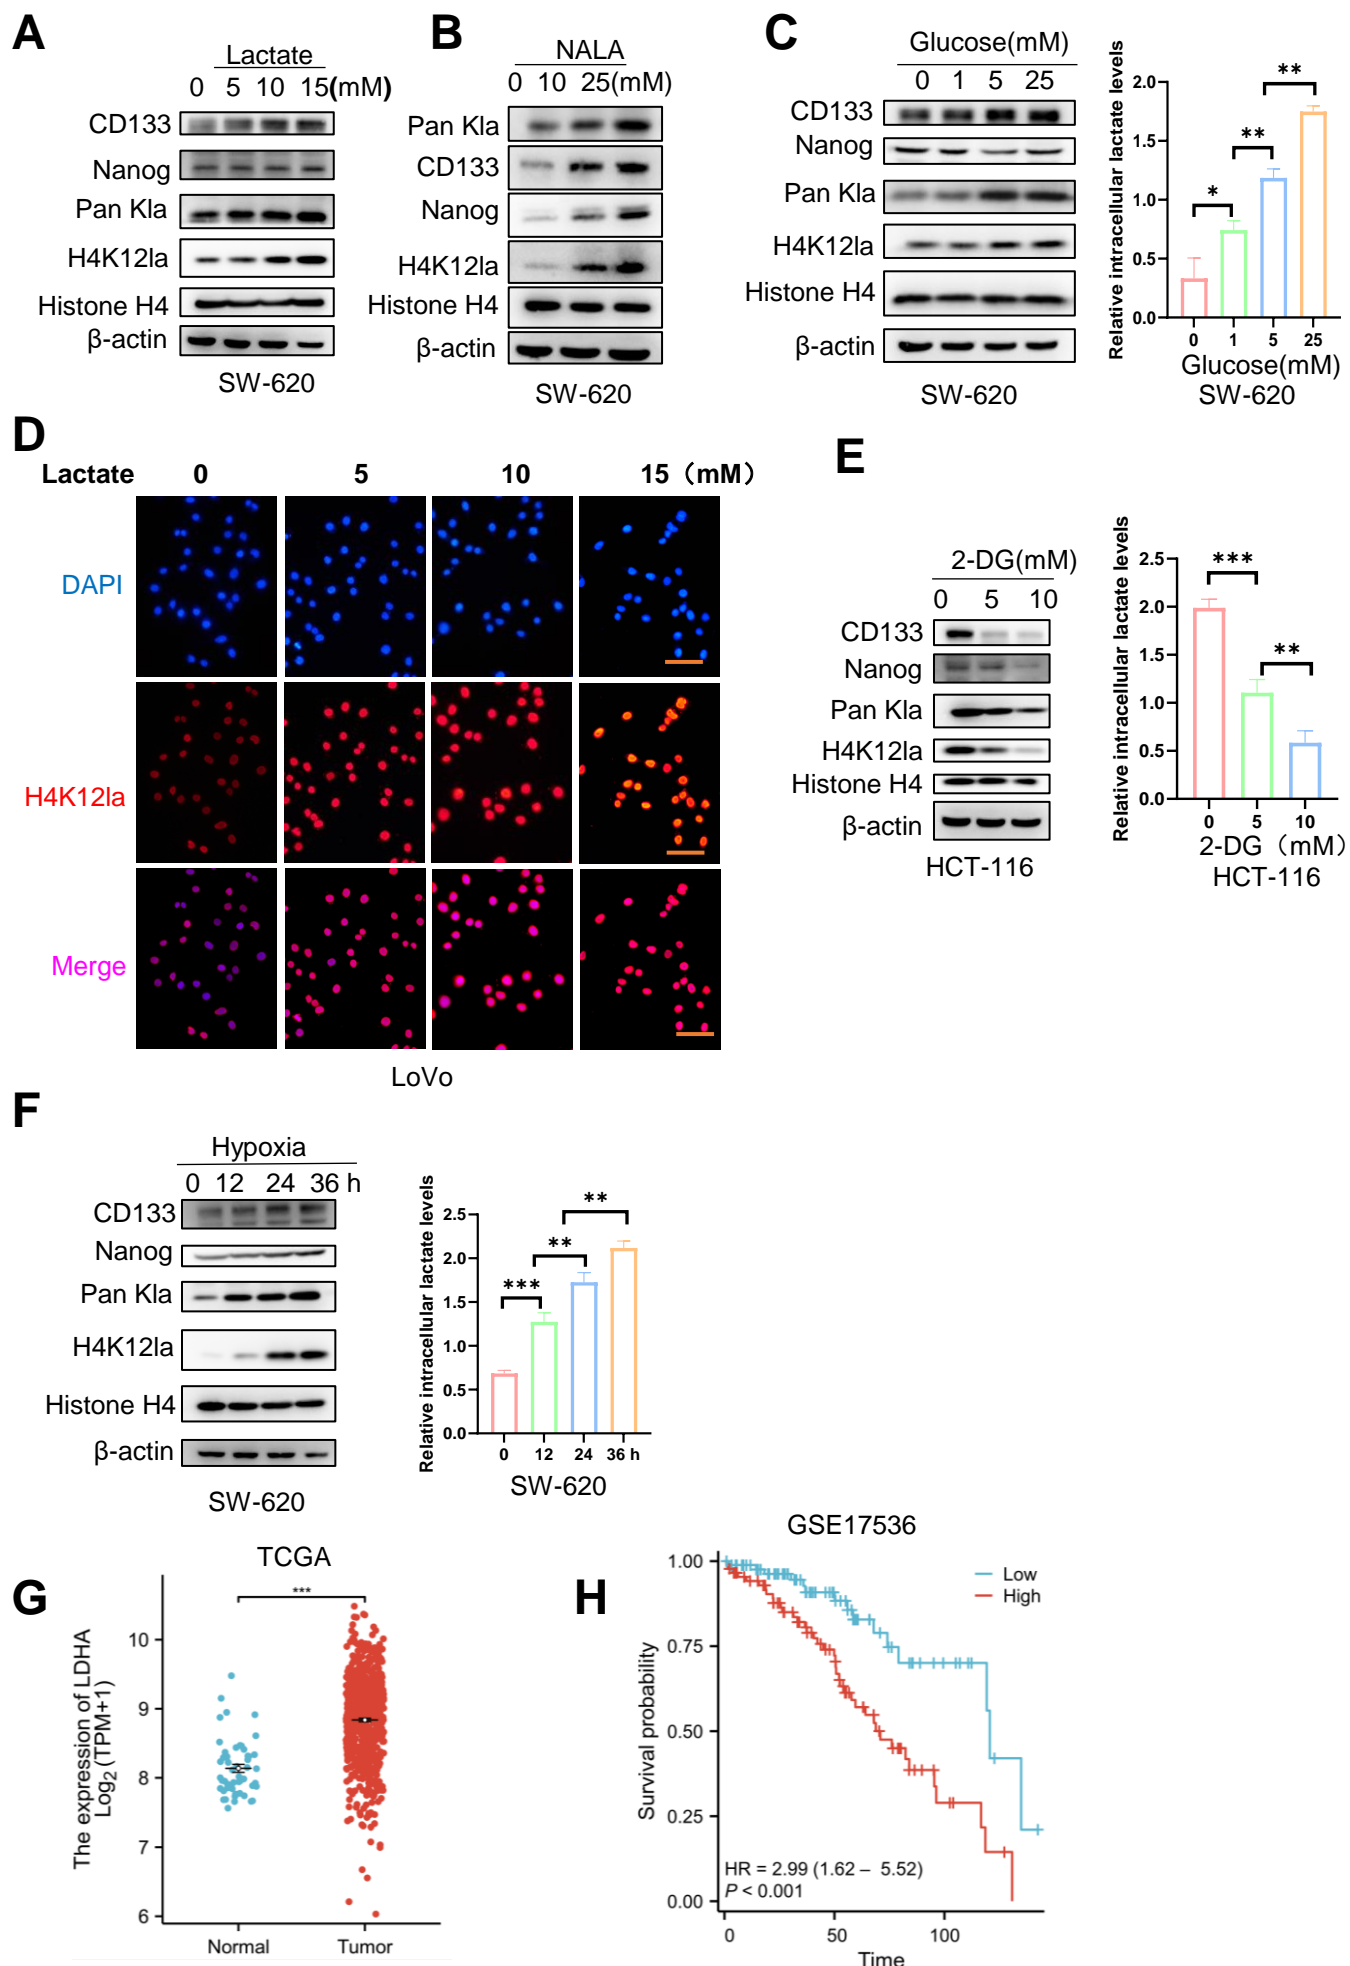

Supplemental Fig. 3

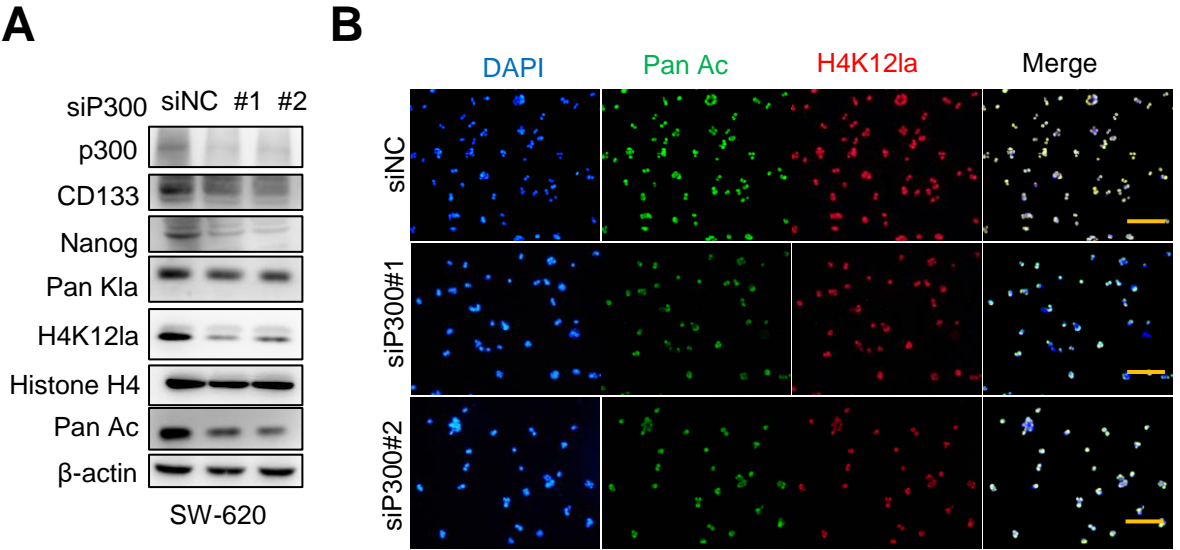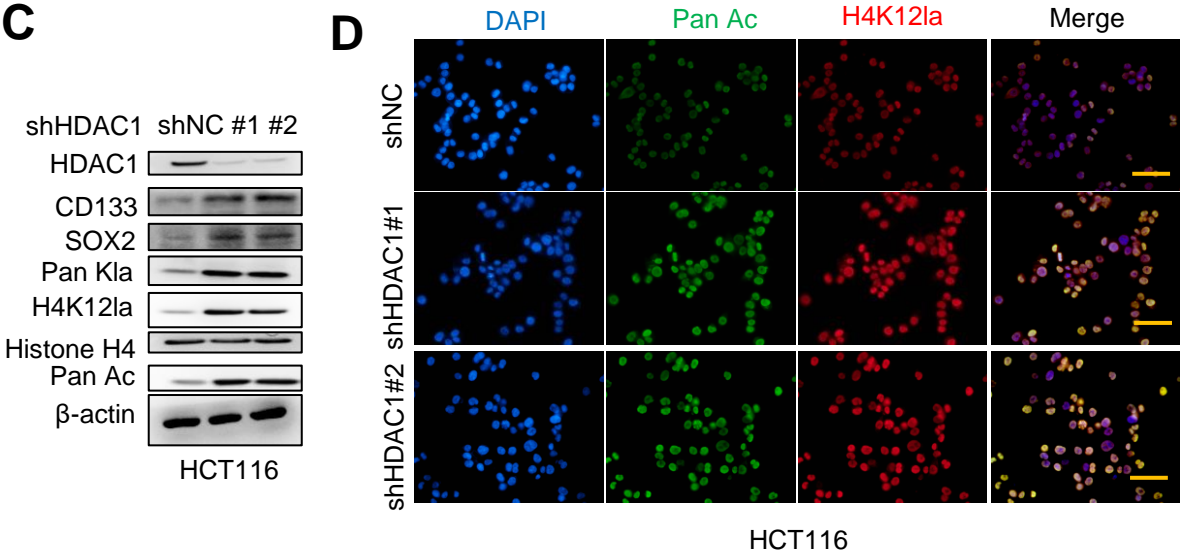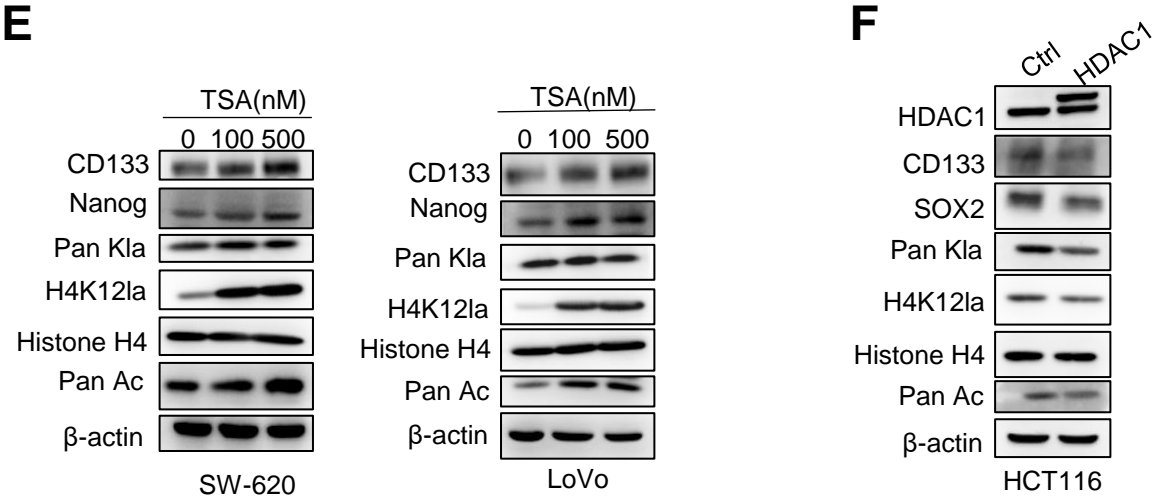

Supplemental Fig. 4

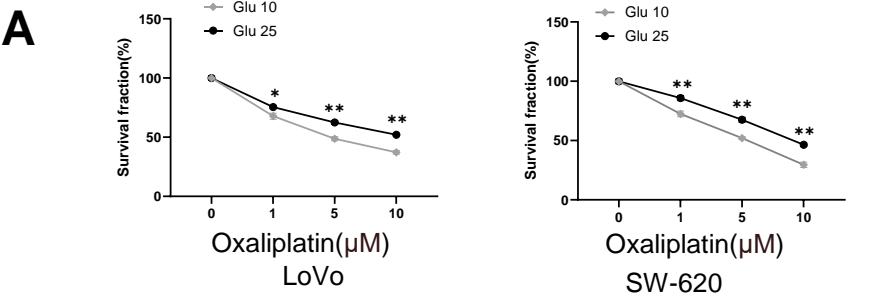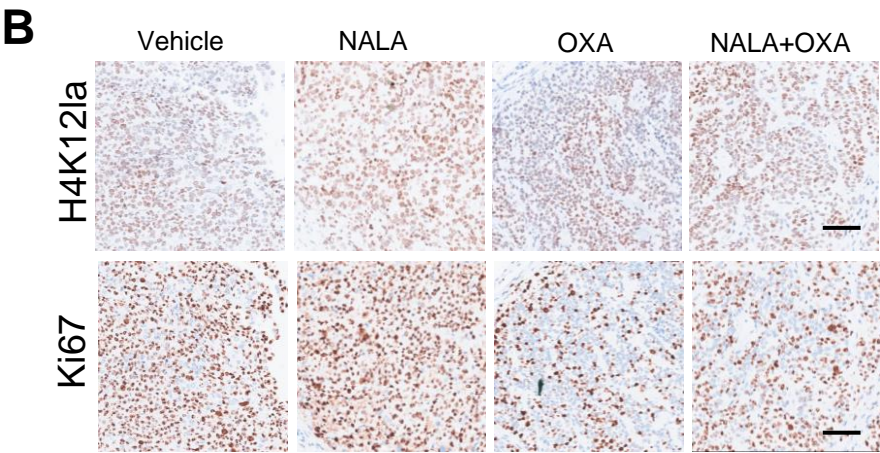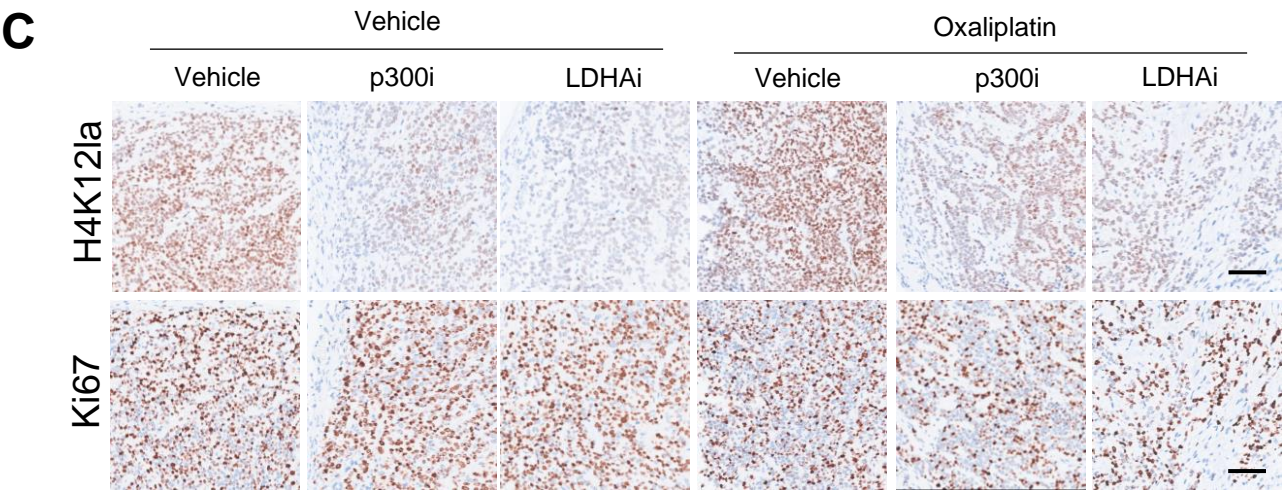

# Supplemental Fig. 5

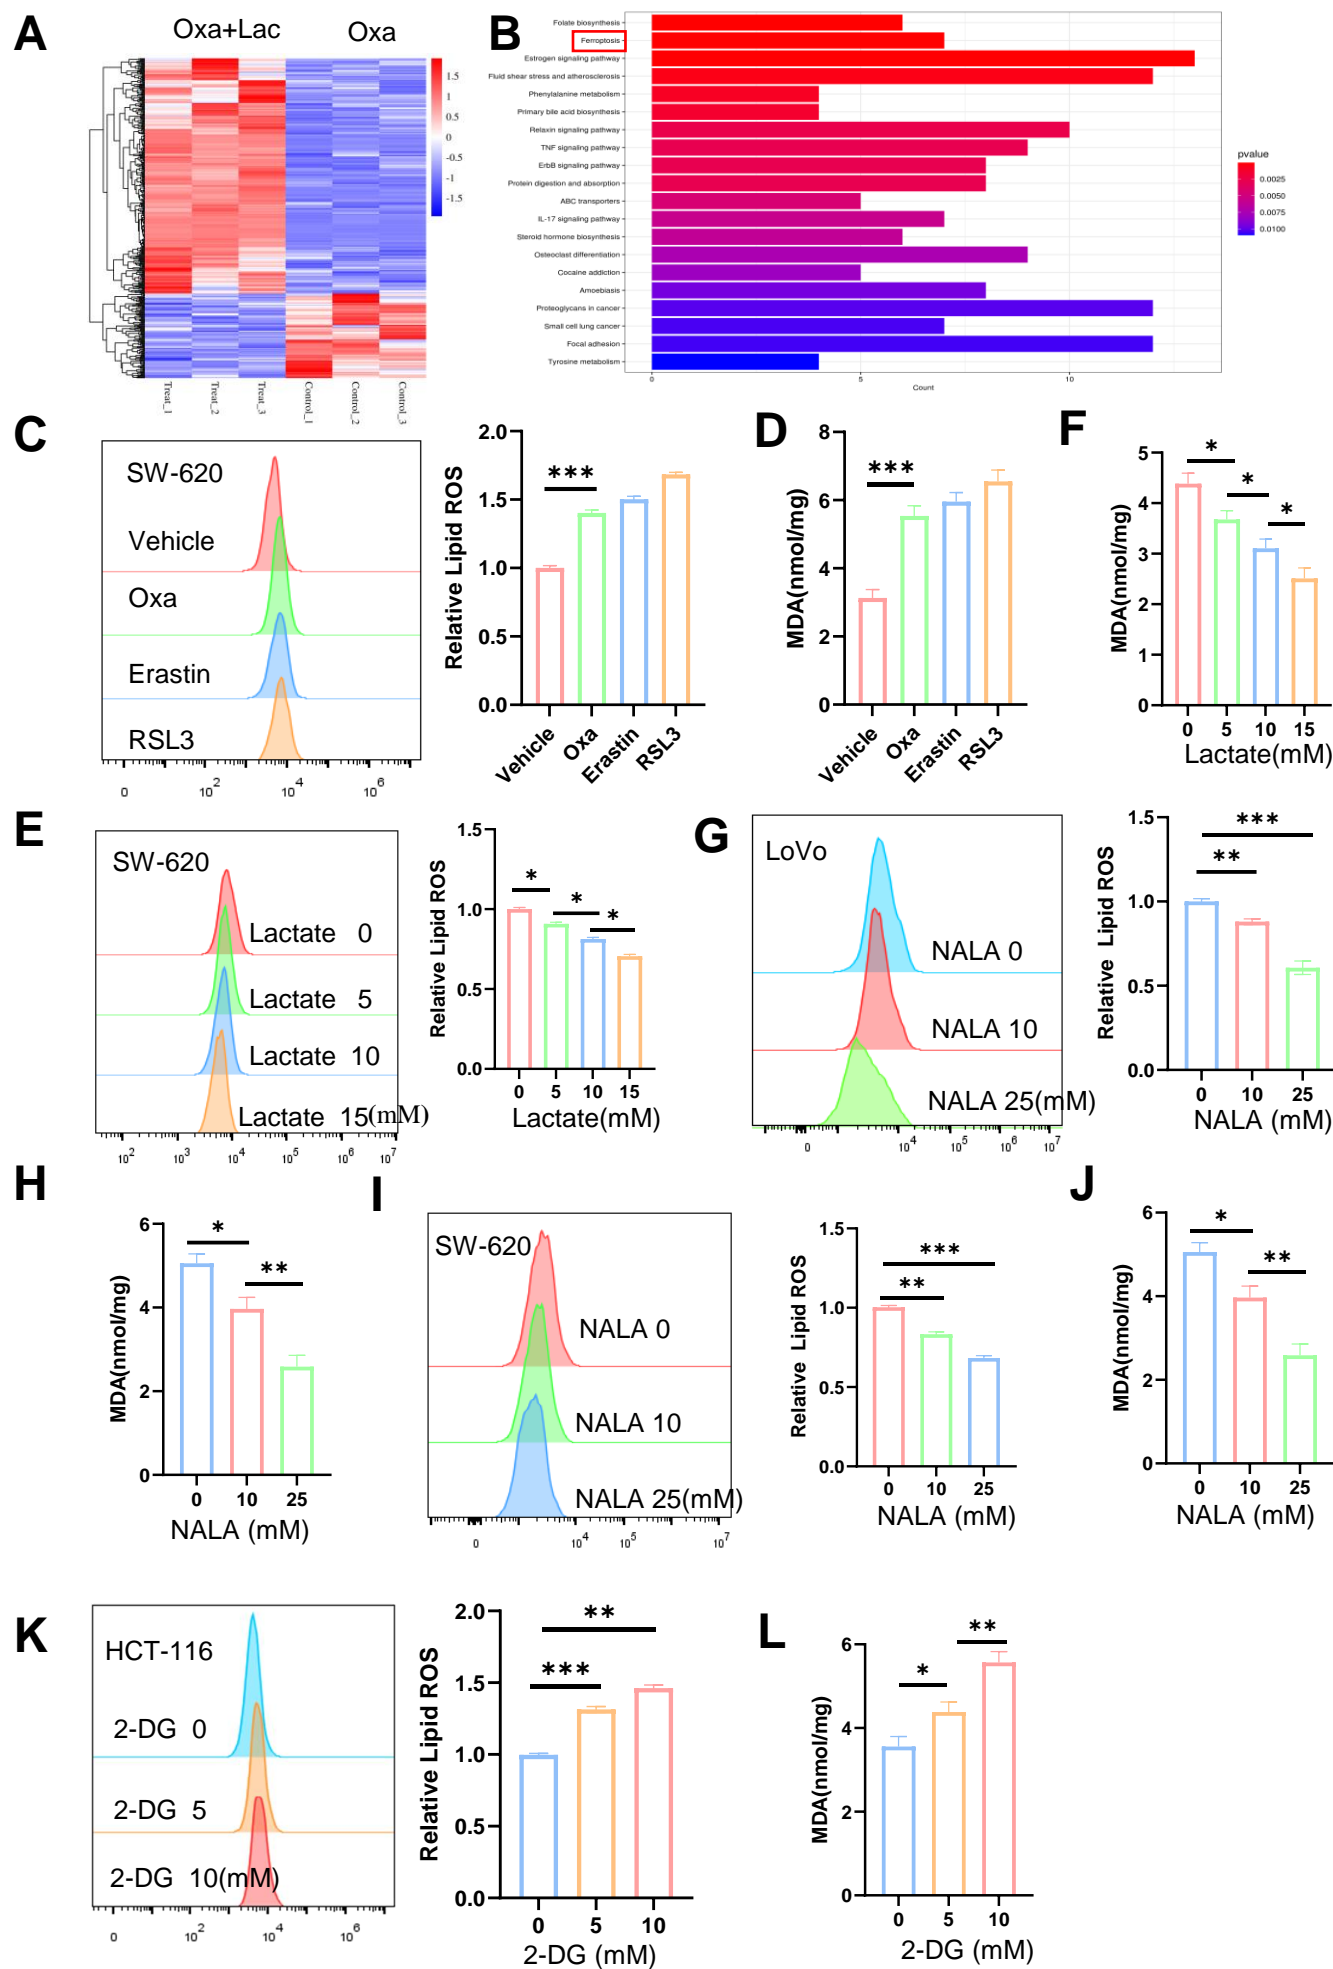

Supplemental Fig. 6

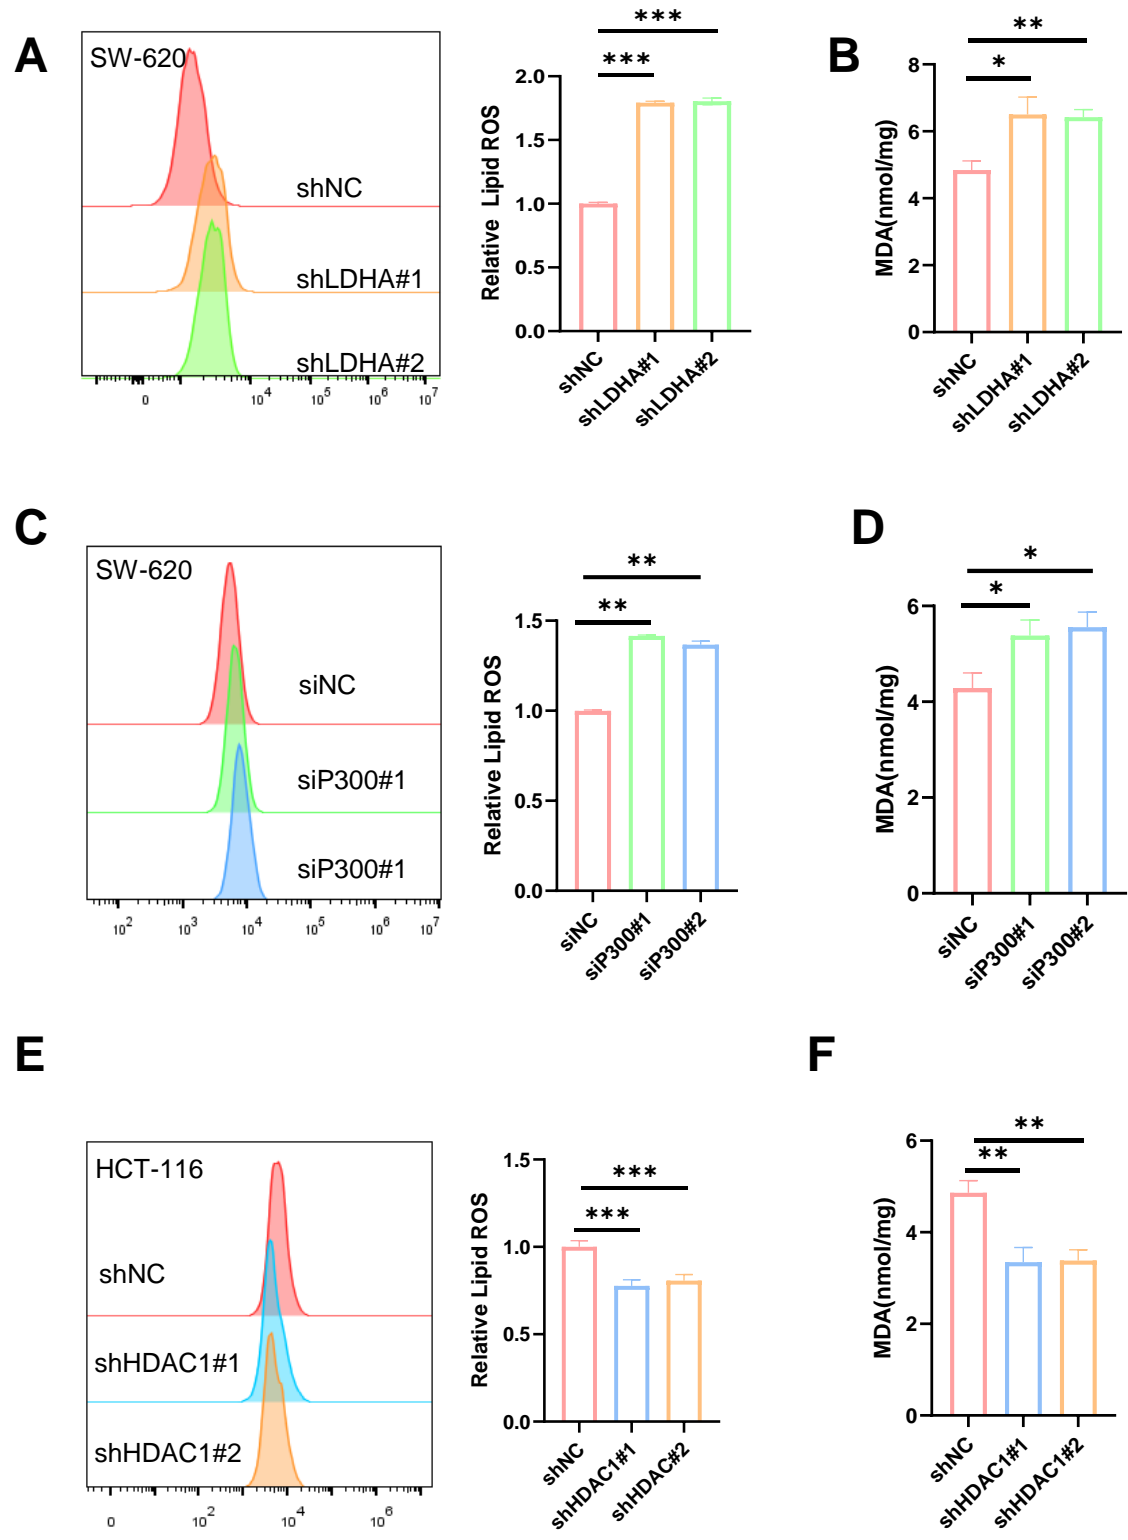



# Supplemental Fig. 7

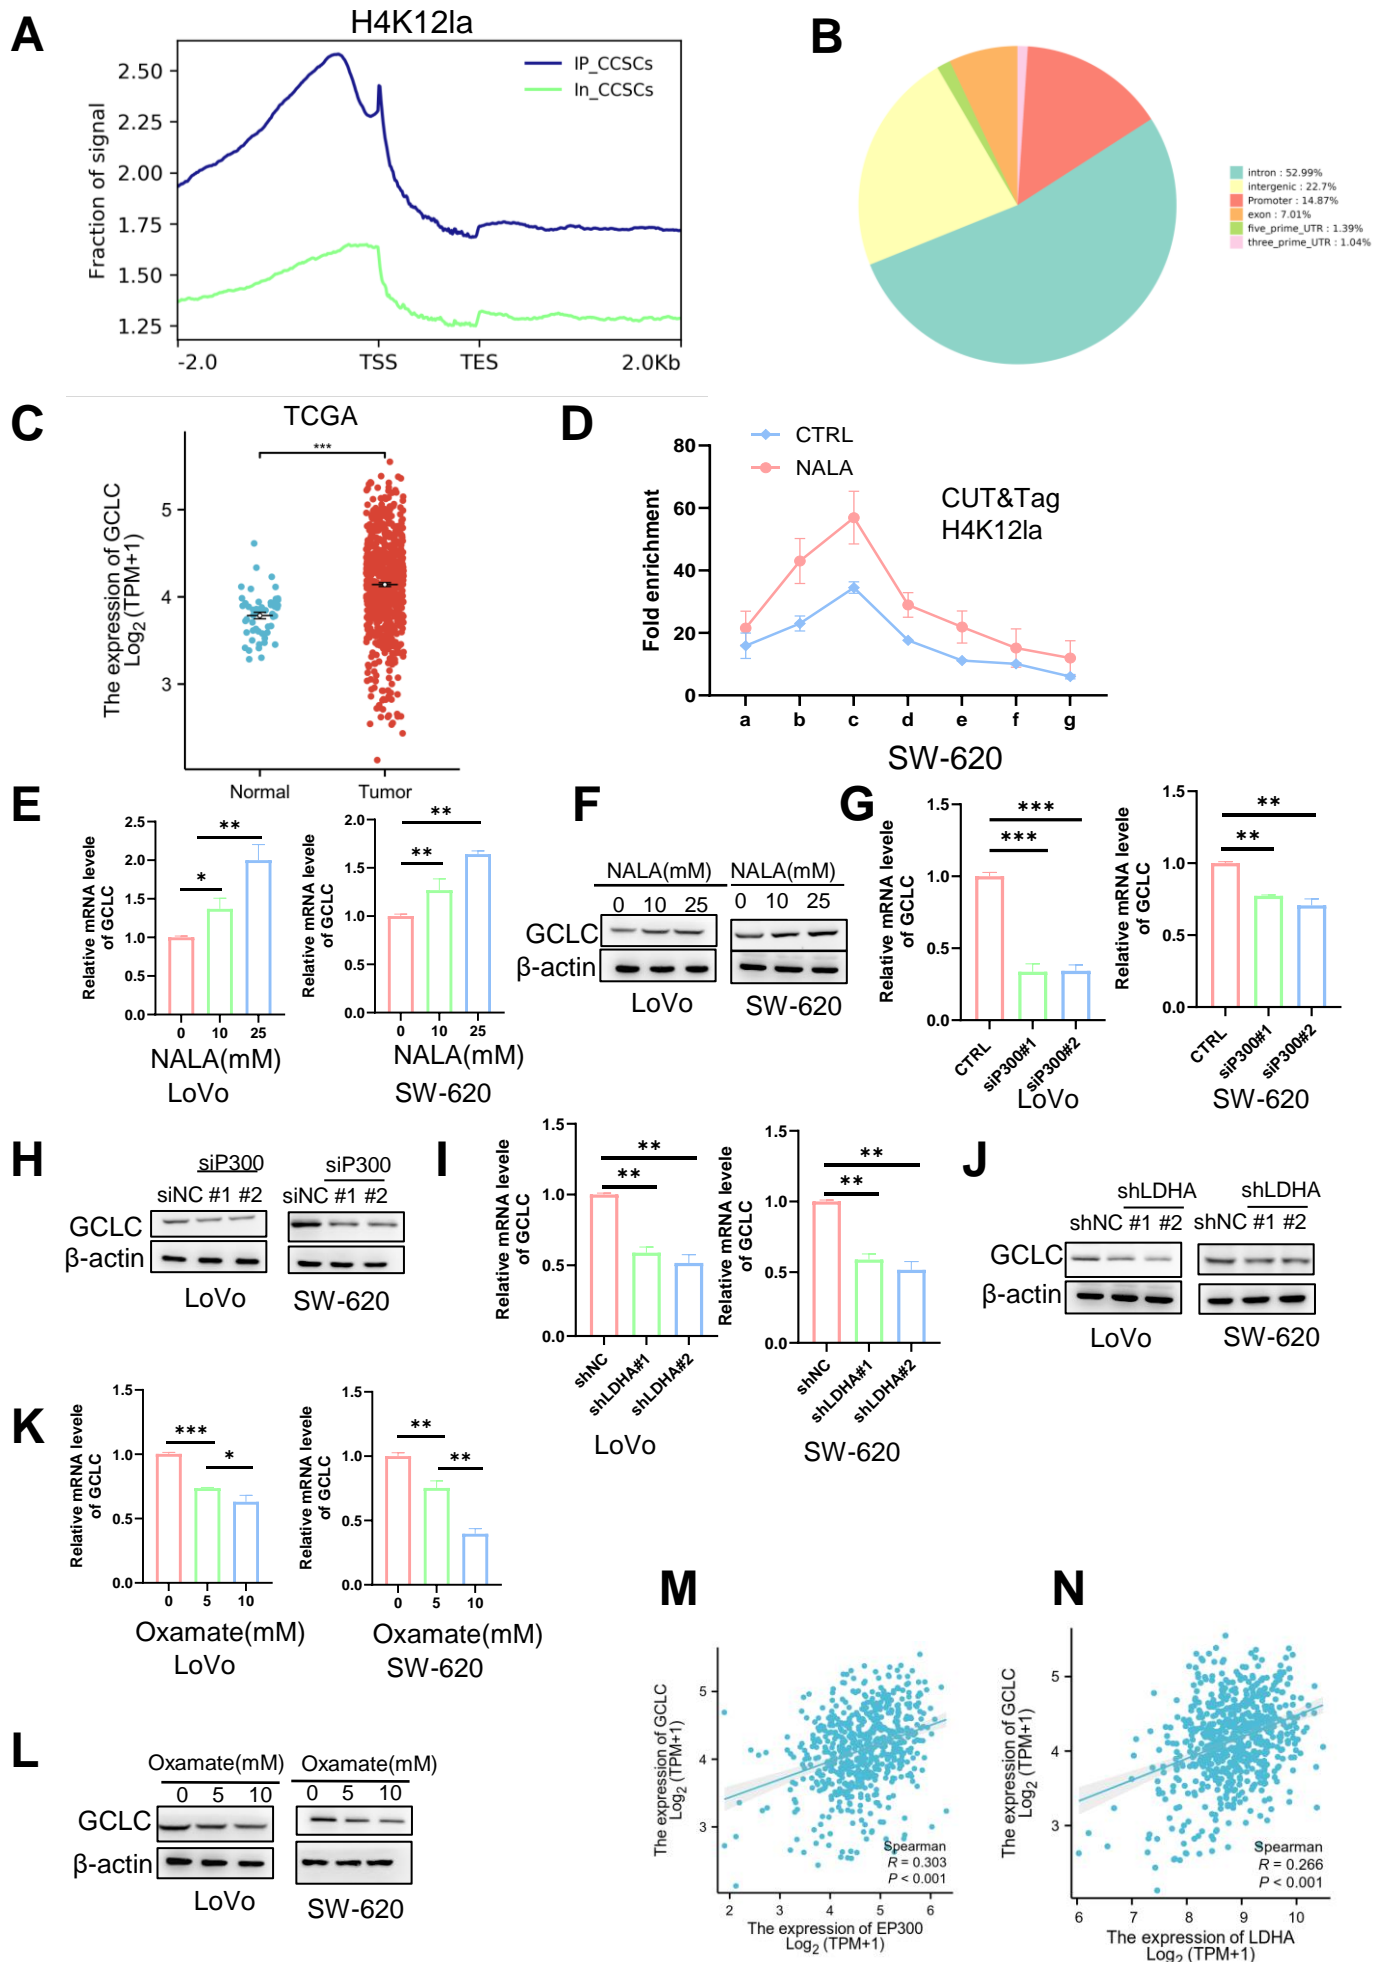

Supplemental Fig. 8

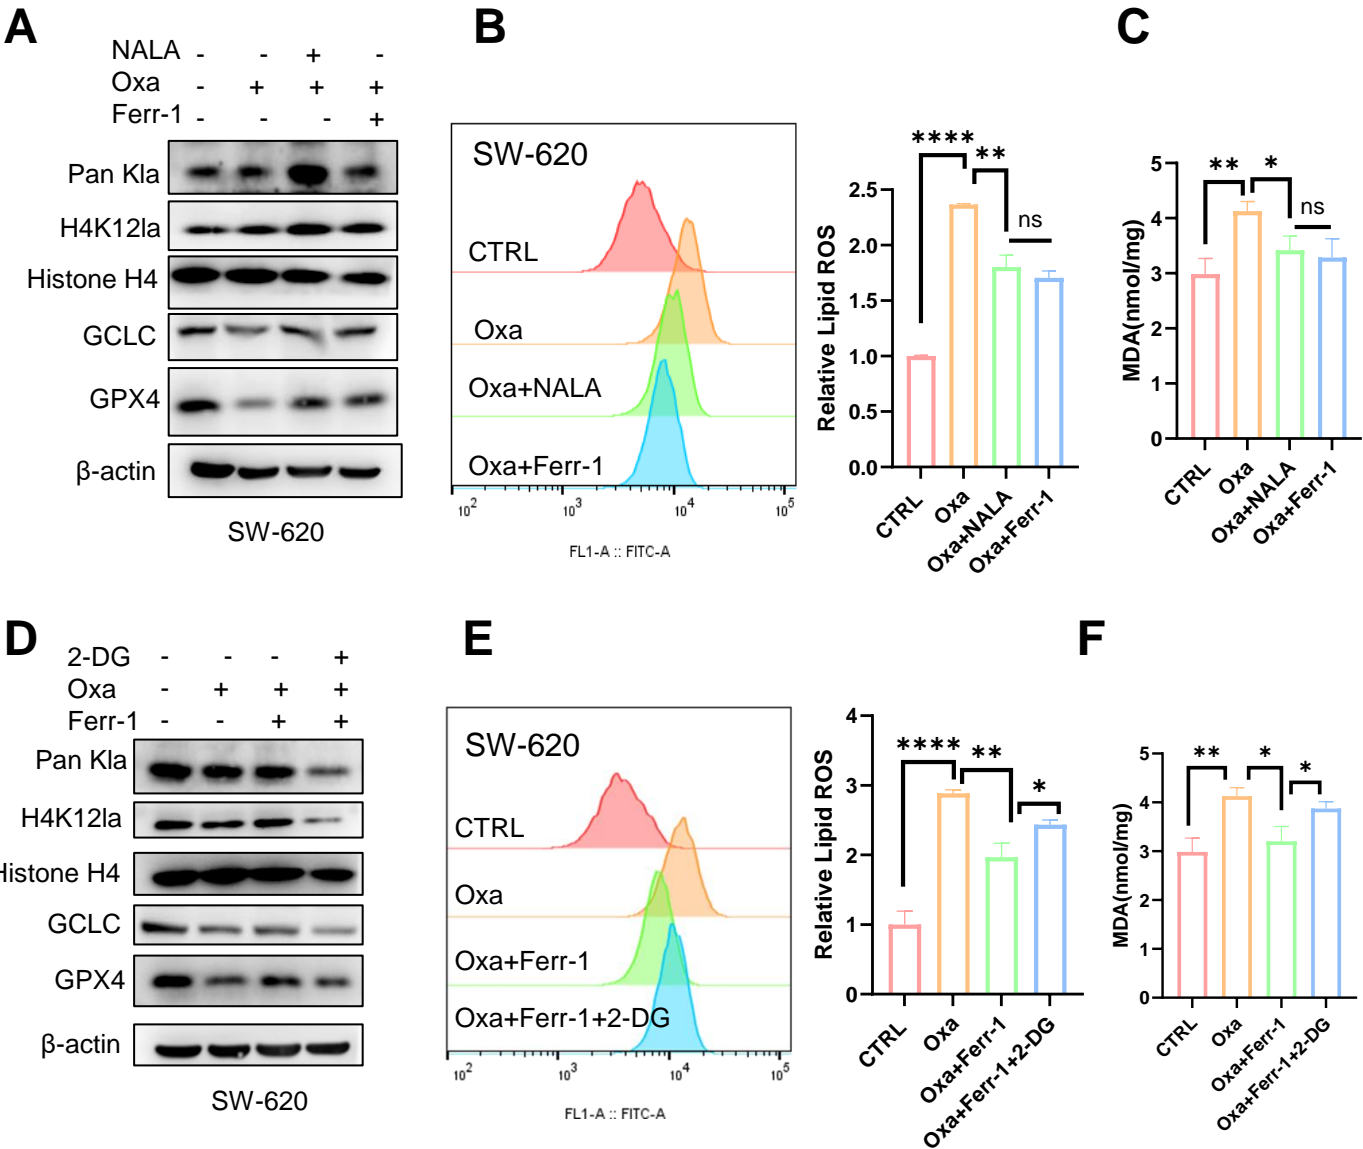

Supplemental Fig. 9

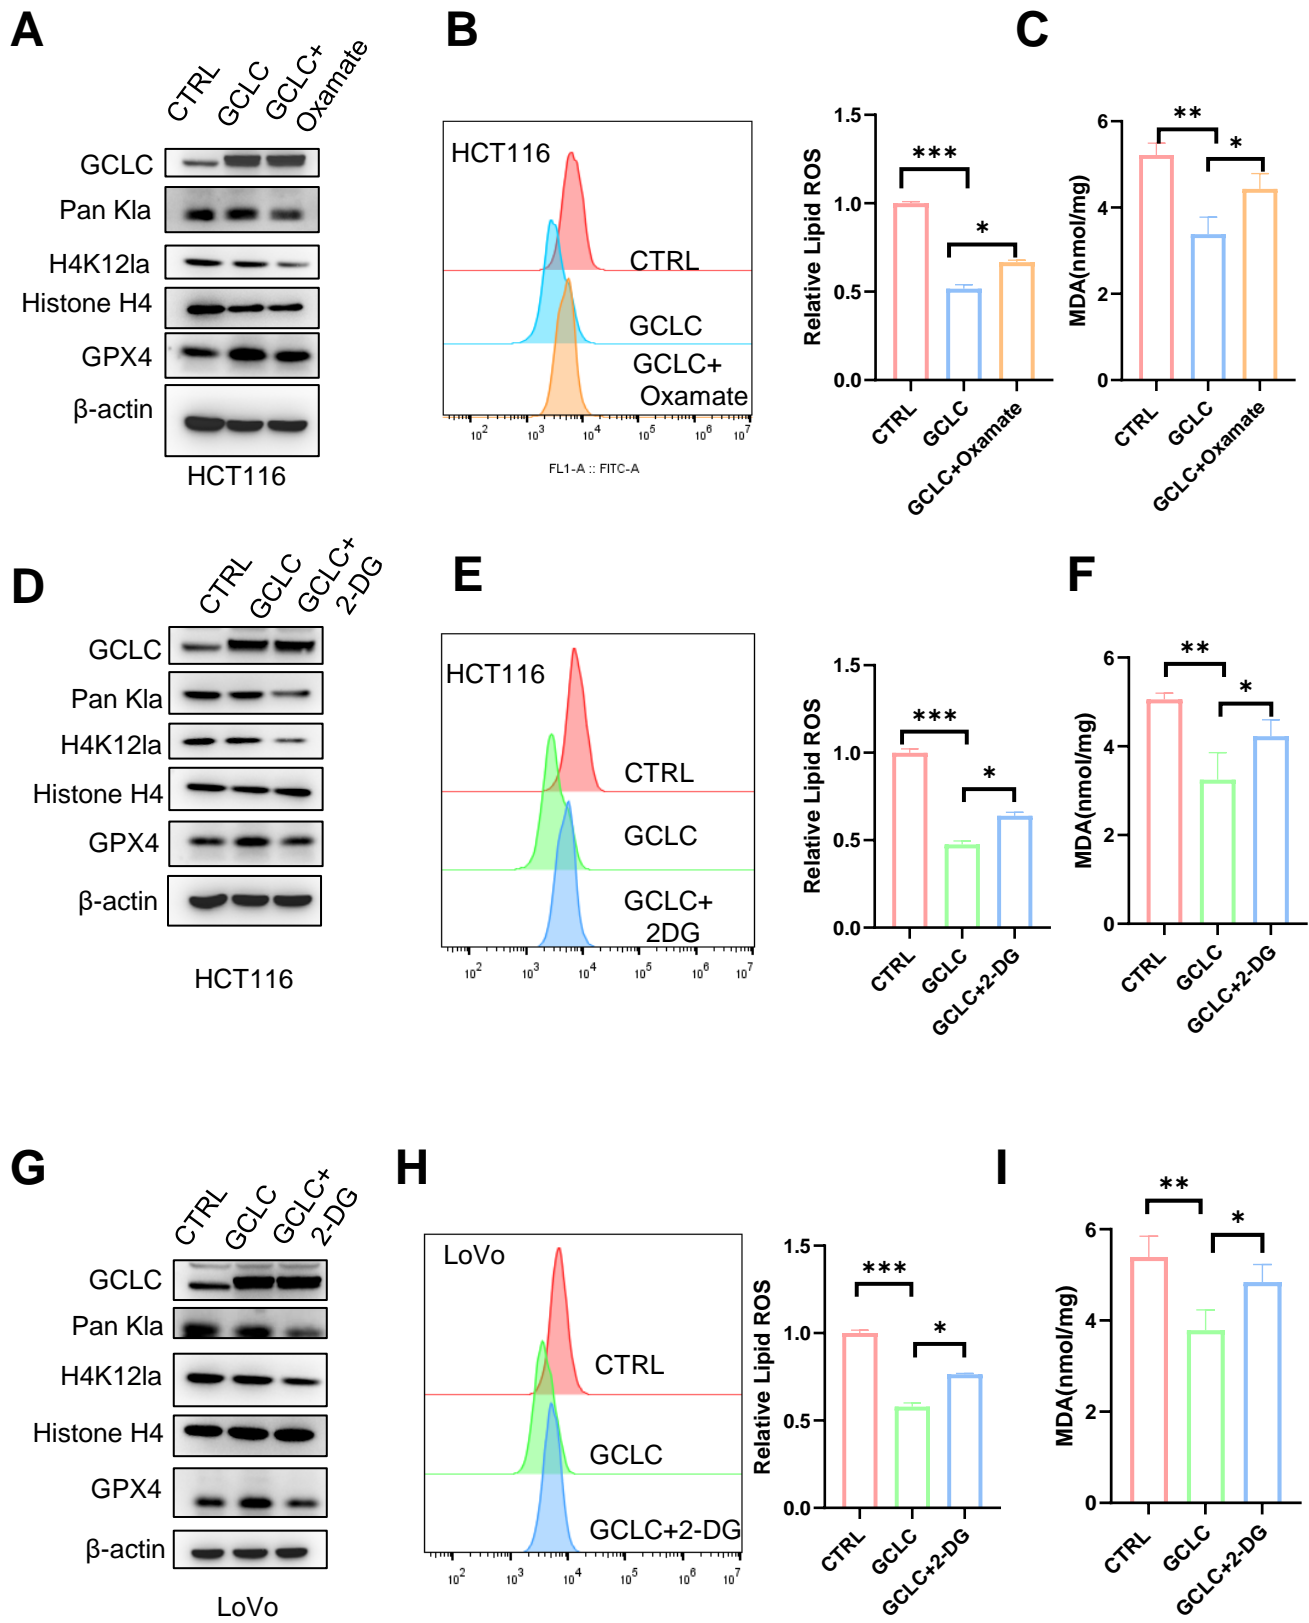



Supplemental Fig. 10

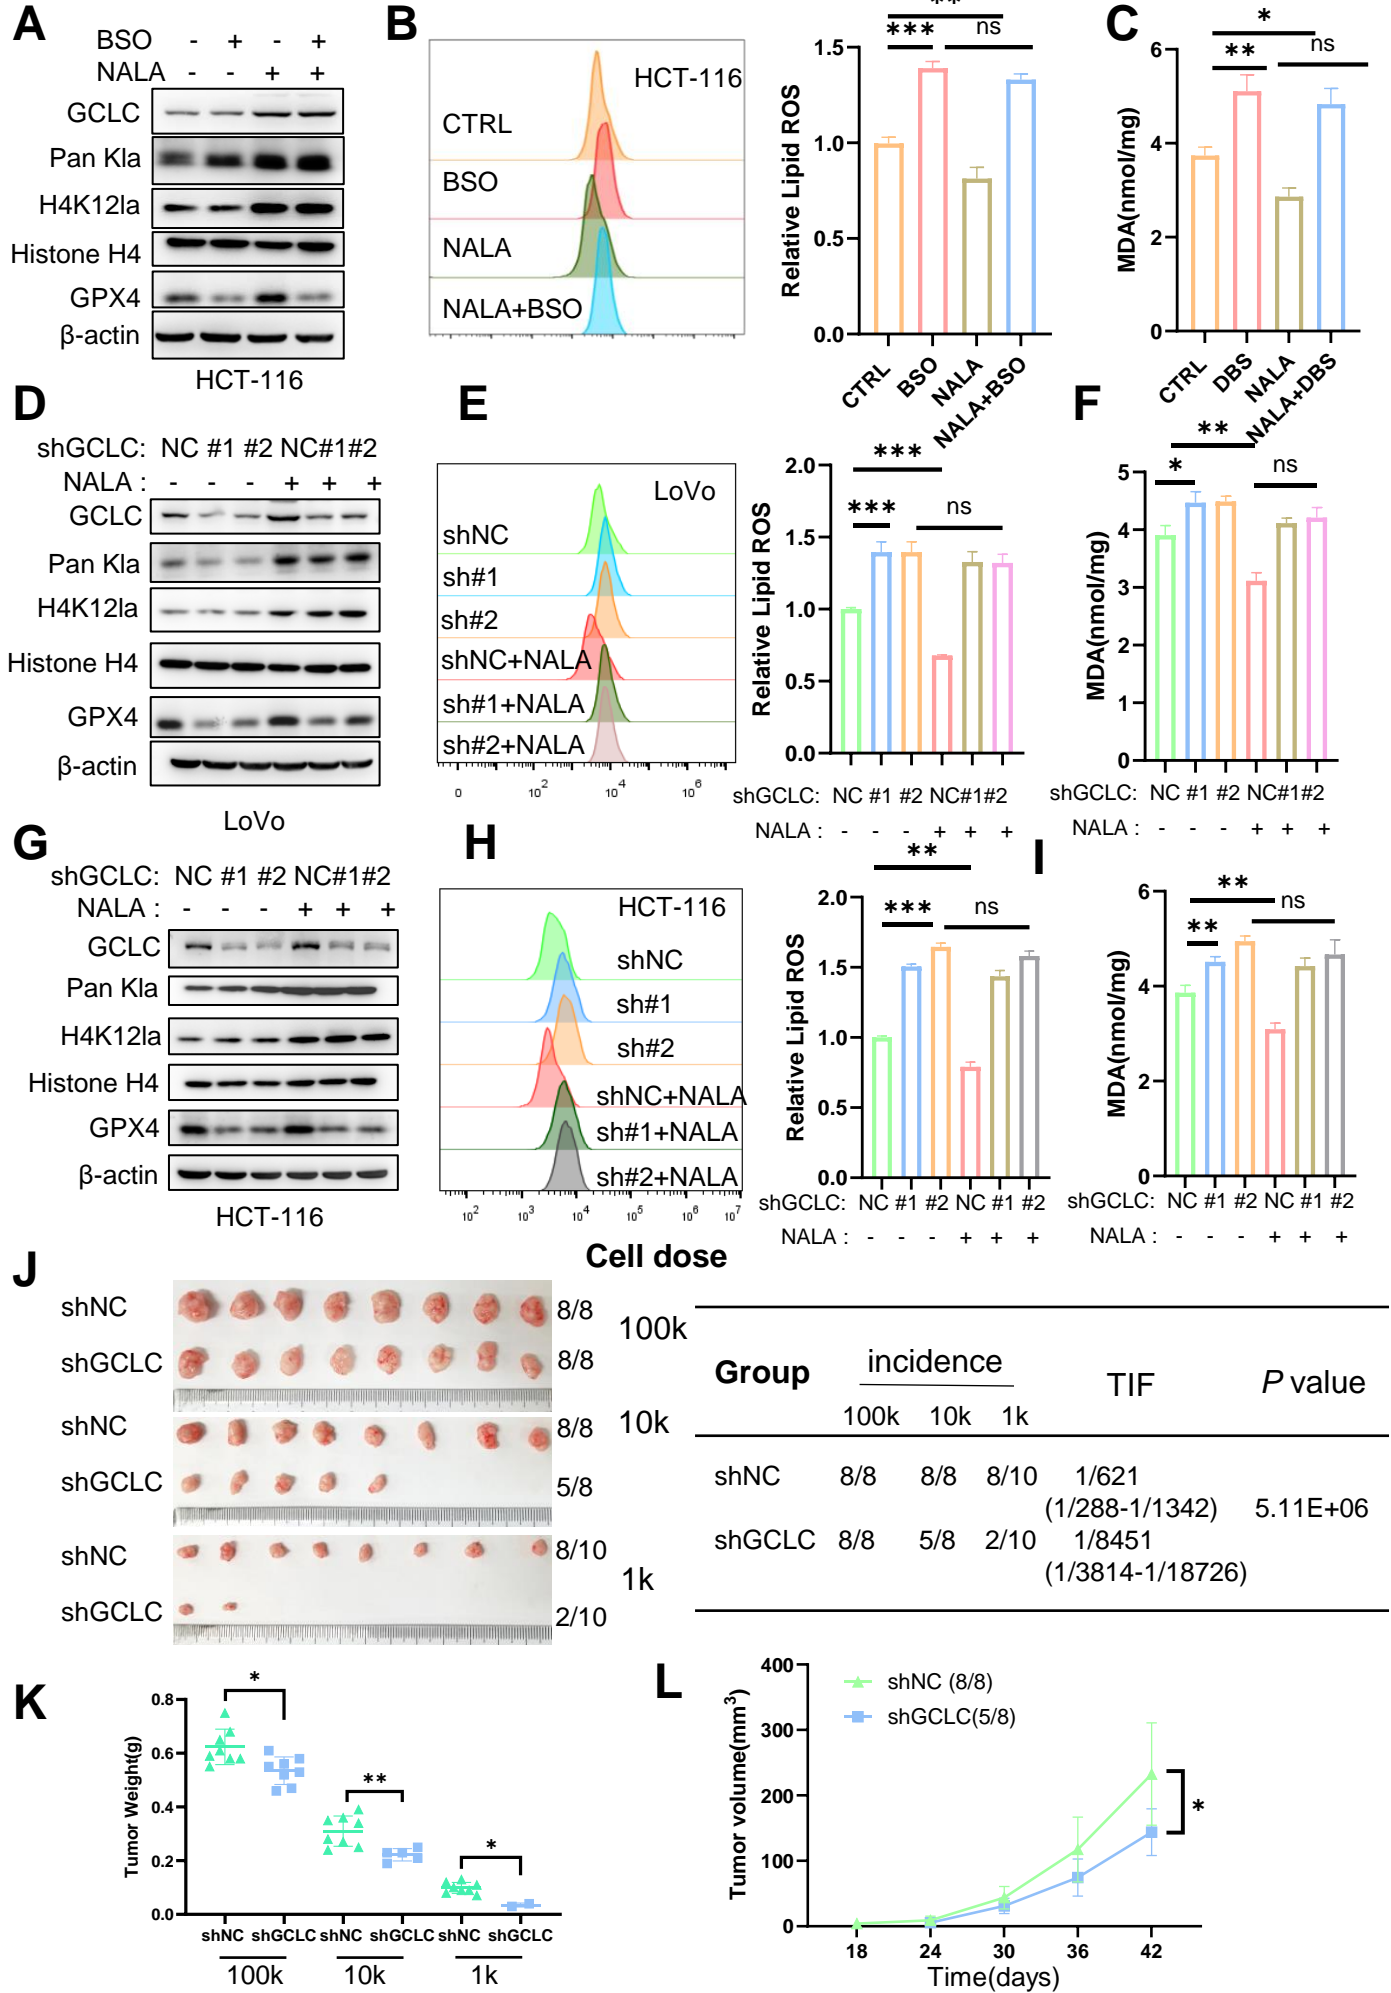

# Supplemental Fig. 11

**A**

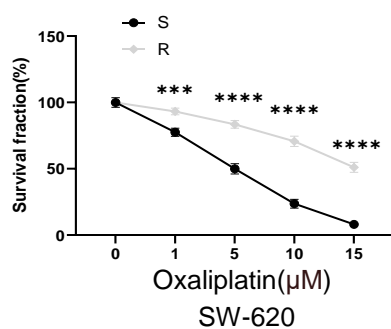

**B**

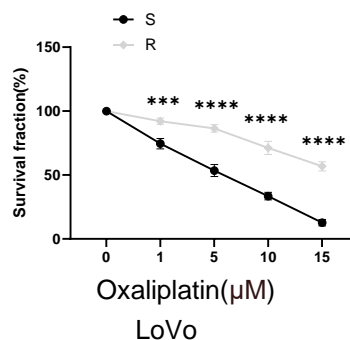

**C**

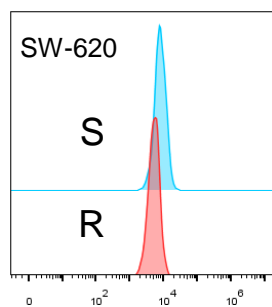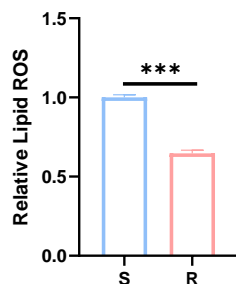

**D**

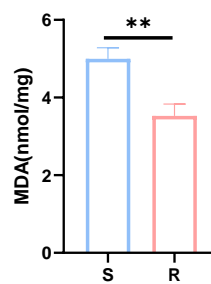

**E**

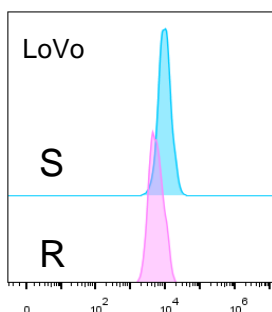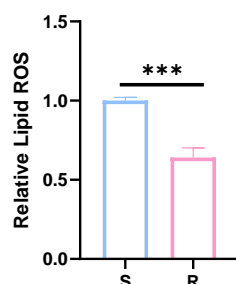

**F**

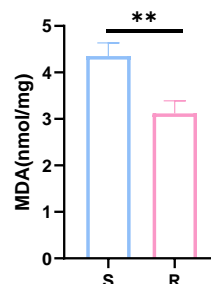

**G**

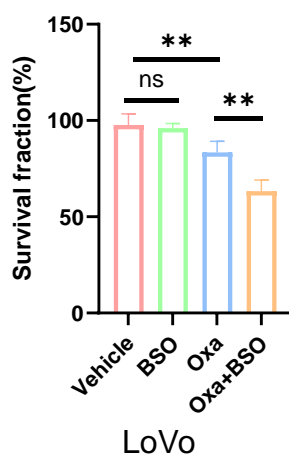

**H**

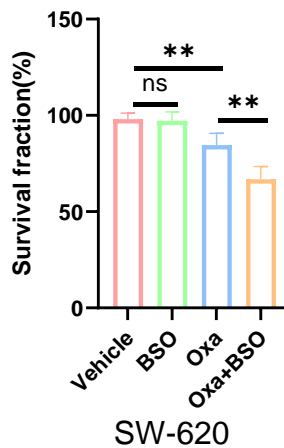

**I**

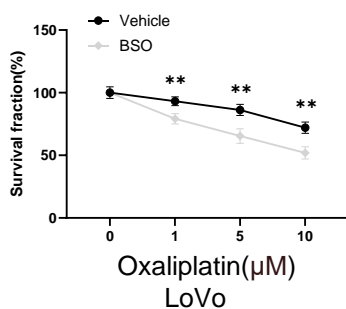

**J**

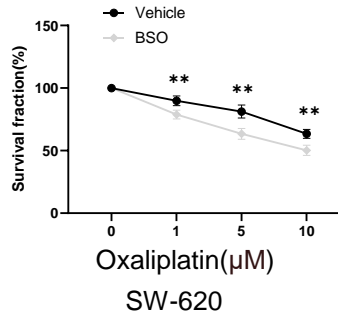

## Table S1 Pan K1a binding proteins

The file is included as an excel file

| Description   | Score       |
|---------------|-------------|
| Histone H4    | 63.54806781 |
| Histone H2B   | 53.29506576 |
| Histone H2A   | 50.1964041  |
| Histone H2A   | 41.88940346 |
| Histone H1.2  | 28.27578676 |
| Histone H1.4  | 28.22905266 |
| Histone H2A   | 25.06000197 |
| Histone H1.5  | 24.78438914 |
| Histone H1.10 | 15.30097985 |
| Histone H3.1  | 7.717903376 |
| Histone H3-7  | 5.093426466 |
| Histone H1.0  | 2.533623457 |
| CREBBP        | 30.54       |
| EP300         | 7.63        |
| HDAC1         | 5.94        |

## Table S2 The sequence of siRNA and shRNA

| The sequence of siRNA and shRNA |                        |
|---------------------------------|------------------------|
| Gene                            | Sequence               |
| sip300#1                        | CAATTCGAGACATCTTGAGA   |
| sip300#2                        | GCCTTCACAATTCCGAGACAT  |
| sip300#3                        | CCCGGTGAACTCTCCTATAAT  |
| shLDHA#1                        | CCACCATGATTAAGGGTCTTT  |
| shLDHA#2                        | CCAAAGATTGTCTCTGGCAA   |
| shLDHA#3                        | CGTTTGAAGAAGAGTGCAGAT  |
| shGCLC#1                        | GCCATTGAAGAACAATAACTA  |
| shGCLC#2                        | CCAATTCTGAACTCTTACCTT  |
| shGCLC#3                        | CCGATGCAGTATTCTGAACTA  |
| shHDAC1#1                       | GCCGGTCATGTCCAAAGTAAT  |
| shHDAC1#2                       | CCGCAAGAACTCTTCCAACCTT |
| shHDAC1#3                       | GCTGCTCAACTATGGTCTCTA  |

## Table S3 The prime used to construct the plasmids

| The prime used to construct the plasmids |                           |                             |
|------------------------------------------|---------------------------|-----------------------------|
| Plasmid                                  | Forward Prime             | Reverse Prim                |
| GCLC                                     | ATGGGGGCTGCTGTCCCAG<br>GG | GTTGGATGAGTCAGTTTTACT<br>TC |
| HDAC1                                    | ATGGCGCAGACGCAGGG         | GGCCAACTTGACCTCCTCCTT<br>GA |

Table S4 The sequences of the primers for the qPCR

| The sequences of the primers for the qPCR |                              |                         |
|-------------------------------------------|------------------------------|-------------------------|
| Gene                                      | Forward Prime                | Reverse Prime           |
| GCLC                                      | GGAGGAAACCAAGCGCCAT          | CTTGACGGCGTGGTAGATGT    |
| ACTB                                      | CATGTACGTTGCTATCCAGGC        | CTCCTTAATGTCACGCACGAT   |
| GCLC a sit                                | TCTGGGGGAGGCTTCTTAGG         | CCCGAAACCCATCGTGTCTG    |
| GCLC b sit                                | GGGTGATTGGGTTCGCAGTT         | TTGCGTAAAGCGAGGCCGA     |
| GCLC c sit                                | CGGGCGCTCACCTCATC            | TGCACATCTACCACGCCG      |
| GCLC d sit                                | CCATGGAAAGACACAAGCAAATC<br>C | GGAACCTTCCCTTTCCTGTTTA  |
| GCLC e sit                                | TTCACGAGGCTCACCTCATT         | GGGTAGGCTTGTGCATTGGAT   |
| GCLC f sit                                | TATCTGCGCAGCCTGTTTCT         | GCCTAGTGGCTCAGATGCAA    |
| GCLC g sit                                | GGCAGGGAAACGTGAAGTCTG        | AAGTGGCACTACTGACTGATCCT |

Table S5 The information of patients

| The information of patients |        |     |           |
|-----------------------------|--------|-----|-----------|
| ID                          | Gender | Age | TNM stage |
| 1010303147                  | Female | 52  | T3N0M0    |
| 60010144349                 | Female | 57  | T3N0M0    |
| 1009900018                  | male   | 25  | T4bN0M0   |
| 60010215306                 | male   | 64  | T3N0M0    |
| 1010428877                  | Female | 64  | T2N0M0    |
| 1009949519                  | Female | 56  | T3N0M0    |
| 1010442781                  | male   | 58  | T2N0M0    |
| 1010535308                  | male   | 48  | T3N0M0    |
| 1010485641                  | male   | 37  | T3N2M0    |
| 1010376570                  | Female | 68  | T1N1M0    |
| 60010312945                 | Female | 52  | T2N1M0    |
| 1010477088                  | male   | 51  | T3N0M0    |

Table S6 colorectal cancer tissue microarray information.

| Sit location | Tissue Types | Score | Level   | State of survival | survival time(month) | T   | N   | M   | AJCC 7th edition clinical staging |
|--------------|--------------|-------|---------|-------------------|----------------------|-----|-----|-----|-----------------------------------|
| A01          | Tumor        |       | 5Low    |                   | 178                  | T3  | N0  | M0  | II                                |
| A03          | Tumor        |       | 1.5Low  |                   | 01                   | T2  | N1b | M0  | III                               |
| A05          | Tumor        |       | 7Low    |                   | 013                  | T3  | N0  | M0  | II                                |
| A07          | Tumor        |       | 6Low    |                   | 178                  | T3  | N0  | M0  | II                                |
| A09          | Tumor        |       | 7Low    |                   | 177                  | T3  | N2b | M0  | III                               |
| A11          | Tumor        |       | 7High   |                   | 07                   | T4a | N2b | M0  | III                               |
| A13          | Tumor        |       | 2Low    |                   | 022                  | T3  | N0  | M1b | IV                                |
| A15          | Tumor        |       | 2Low    |                   | 177                  | T3  | N0  | M0  | II                                |
| A17          | Tumor        |       | 2.5Low  |                   | 177                  | T4a | N0  | M0  | II                                |
| B01          | Tumor        |       | 4Low    |                   | 177                  | T3  | N0  | M0  | II                                |
| B03          | Tumor        |       | 7Low    |                   | 177                  | T3  | N0  | M0  | II                                |
| B05          | Tumor        |       | 12High  |                   | 044                  | T4a | N0  | M0  | II                                |
| B07          | Tumor        |       | 4Low    |                   | 177                  | T2  | N0  | M0  | I                                 |
| B09          | Tumor        |       | 6Low    |                   | 176                  | T3  | N0  | M0  | II                                |
| B11          | Tumor        |       | 8High   |                   | 038                  | T4a | N0  | M0  | II                                |
| B13          | Tumor        |       | 8High   |                   | 013                  | T4b | N1b | M0  | III                               |
| B15          | Tumor        |       | 8High   |                   | 08                   | T4a | N0  | M0  | II                                |
| B17          | Tumor        |       | 4Low    |                   | 176                  | T1  | N0  | M0  | I                                 |
| C01          | Tumor        |       | 12High  |                   | 056                  | T4a | N2a | M0  | III                               |
| C03          | Tumor        |       | 8High   |                   | 017                  | T4a | N0  | M1b | IV                                |
| C05          | Tumor        |       | 12High  |                   | 176                  | T3  | N0  | M0  | II                                |
| C07          | Tumor        |       | 12High  |                   | 012                  | T3  | N0  | M0  | II                                |
| C09          | Tumor        |       | 5Low    |                   | 176                  | T2  | N0  | M0  | I                                 |
| C11          | Tumor        |       | 8High   |                   | 040                  | T2  | N0  | M0  | I                                 |
| C13          | Tumor        |       | 7Low    |                   | 042                  | T3  | N1a | M0  | III                               |
| C15          | Tumor        | null  |         |                   | 176                  | T3  | N1b | M0  | III                               |
| C17          | Tumor        |       | 2.5Low  |                   | 033                  | T3  | N0  | M0  | II                                |
| D01          | Tumor        |       | 5Low    |                   | 175                  | T3  | N1b | M0  | III                               |
| D03          | Tumor        |       | 12High  |                   | 175                  | T3  | N0  | M0  | II                                |
| D05          | Tumor        |       | 9High   |                   | 040                  | T4a | N0  | M0  | II                                |
| D07          | Tumor        |       | 5Low    |                   | 175                  | T3  | N0  | M0  | II                                |
| D09          | Tumor        |       | 5Low    |                   | 175                  | T2  | N0  | M0  | I                                 |
| D11          | Tumor        |       | 8High   |                   | 023                  | T4b | N1b | M0  | III                               |
| D13          | Tumor        |       | 7Low    |                   | 175                  | T3  | N0  | M0  | II                                |
| D15          | Tumor        |       | 8High   |                   | 175                  | T3  | N0  | M0  | II                                |
| D17          | Tumor        |       | 6Low    |                   | 175                  | T3  | N0  | M0  | II                                |
| E01          | Tumor        | null  |         |                   | 175                  | T3  | N0  | M0  | II                                |
| E03          | Tumor        |       | 6High   |                   | 175                  | T3  | N0  | M0  | II                                |
| E05          | Tumor        |       | 2.5Low  |                   | 175                  | T3  | N0  | M0  | II                                |
| E07          | Tumor        |       | 1.5Low  |                   | 175                  | T3  | N0  | M0  | II                                |
| E09          | Tumor        |       | 5Low    |                   | 013                  | T4a | N1b | M0  | III                               |
| E11          | Tumor        |       | 6Low    |                   | 174                  | T3  | N0  | M0  | II                                |
| E13          | Tumor        |       | 7Low    |                   | 039                  | T4a | N1b | M0  | III                               |
| E15          | Tumor        |       | 2Low    |                   | 174                  | T2  | N0  | M0  | I                                 |
| E17          | Tumor        |       | 6Low    |                   | 013                  | T3  | N0  | M0  | II                                |
| F01          | Tumor        |       | 1.5Low  |                   | 01                   | T3  | N0  | M0  | II                                |
| F03          | Tumor        |       | 7Low    |                   | 173                  | T3  | N0  | M0  | II                                |
| F05          | Tumor        |       | 8.5High |                   | 173                  | T4a | N1b | M0  | III                               |
| F07          | Tumor        |       | 6Low    |                   | 173                  | T3  | N0  | M0  | II                                |
| F09          | Tumor        |       | 12High  |                   | 173                  | T3  | N0  | M0  | II                                |
| F11          | Tumor        |       | 8High   |                   | 173                  | T3  | N0  | M0  | II                                |
| F13          | Tumor        |       | 8High   |                   | 07                   | T3  | N1a | M0  | III                               |
| F15          | Tumor        |       | 7.5High |                   | 173                  | T3  | N1a | M0  | III                               |
| F17          | Tumor        |       | 6Low    |                   | 173                  | T2  | N0  | M0  | I                                 |
| G01          | Tumor        |       | 8Low    |                   | 016                  | T4b | N1b | M0  | III                               |
| G03          | Tumor        |       | 12High  |                   | 016                  | T4a | N2a | M1a | IV                                |
| G05          | Tumor        |       | 9High   |                   | 172                  | T3  | N0  | M0  | II                                |
| G07          | Tumor        |       | 12High  |                   | 021                  | T4a | N0  | M0  | II                                |
| G09          | Tumor        |       | 9High   |                   | 172                  | T3  | N0  | M0  | II                                |
| G11          | Tumor        |       | 6Low    |                   | 172                  | T4a | N0  | M0  | II                                |
| G13          | Tumor        |       | 8High   |                   | 172                  | T4a | N1a | M0  | III                               |
| G15          | Tumor        |       | 7Low    |                   | 171                  | T3  | N0  | M0  | II                                |
| G17          | Tumor        |       | 6Low    |                   | 171                  | T3  | N0  | M0  | II                                |
| H01          | Tumor        |       | 12High  |                   | 171                  | T4a | N0  | M0  | II                                |
| H03          | Tumor        |       | 9High   |                   | 171                  | T3  | N1a | M0  | III                               |
| H05          | Tumor        |       | 4Low    |                   | 171                  | T2  | N0  | M0  | I                                 |
| H07          | Tumor        |       | 9High   |                   | 171                  | T4a | N0  | M0  | II                                |
| H09          | Tumor        |       | 9High   |                   | 171                  | T3  | N0  | M0  | II                                |
| H11          | Tumor        |       | 7Low    |                   | 00.4                 | T3  | N2b | M0  | III                               |
| H13          | Tumor        |       | 6Low    |                   | 067                  | T3  | N0  | M0  | II                                |
| H15          | Tumor        |       | 6Low    |                   | 170                  | T4a | N0  | M0  | II                                |
| H17          | Tumor        |       | 12High  |                   | 058                  | T3  | N0  | M0  | II                                |
| I01          | Tumor        |       | 6Low    |                   | 170                  | T3  | N0  | M0  | II                                |
| I03          | Tumor        |       | 5Low    |                   | 170                  | T3  | N0  | M0  | II                                |
| I05          | Tumor        |       | 6Low    |                   | 170                  | T4a | N0  | M0  | II                                |
| I07          | Tumor        |       | 12High  |                   | 170                  | T3  | N0  | M0  | II                                |
| I09          | Tumor        |       | 5Low    |                   | 170                  | T4b | N0  | M0  | II                                |
| I11          | Tumor        |       | 1.5Low  |                   | 019                  | T4a | N2a | M0  | III                               |
| I13          | Tumor        |       | 8High   |                   | 035                  | T3  | N0  | M0  | II                                |
| I15          | Tumor        |       | 8High   |                   | 169                  | T4a | N1a | M0  | III                               |
| I17          | Tumor        |       | 2Low    |                   | 169                  | T4a | N1b | M0  | III                               |
| J01          | Tumor        |       | 7.5High |                   | 169                  | T2  | N0  | M0  | I                                 |
| J03          | Tumor        |       | 8.5High |                   | 042                  | T3  | N2b | M0  | III                               |
| J05          | Tumor        |       | 12High  |                   | 019                  | T3  | N2a | M0  | III                               |
| J07          | Tumor        |       | 9High   |                   | 169                  | T3  | N1b | M0  | III                               |
| J09          | Tumor        |       | 12High  |                   | 015                  | T3  | N1b | M0  | III                               |
| J11          | Tumor        |       | 8.5High |                   | 067                  | T4a | N1b | M0  | III                               |
| J13          | Tumor        |       | 6Low    |                   | 169                  | T2  | N0  | M0  | I                                 |
| J15          | Tumor        |       | 12High  |                   | 023                  | T4a | N1b | M0  | III                               |
| J17          | Tumor        |       | 6Low    |                   | 019                  | T3  | N1a | M0  | III                               |

Table S7 colorectal cancer tissue microarray information.

| Sit location | Tissue Types | Score |
|--------------|--------------|-------|
| A16          | Normal       | null  |
| B08          | Normal       | null  |
| D08          | Normal       | null  |
| D10          | Normal       | null  |
| E04          | Normal       | null  |
| E10          | Normal       | null  |
| F12          | Normal       | null  |
| I18          | Normal       | null  |
| J18          | Normal       | null  |
| A02          | Normal       | 3     |
| A04          | Normal       | 1.5   |
| A06          | Normal       | 2     |
| A08          | Normal       | 1     |
| A10          | Normal       | 1     |
| A12          | Normal       | 2     |
| A14          | Normal       | 1     |
| A18          | Normal       | 1.5   |
| B02          | Normal       | 2     |
| B04          | Normal       | 2     |
| B06          | Normal       | 3     |
| B10          | Normal       | 6     |
| B12          | Normal       | 3     |
| B14          | Normal       | 2     |
| B16          | Normal       | 1     |
| B18          | Normal       | 2     |
| C02          | Normal       | 1.5   |
| C04          | Normal       | 1.5   |
| C06          | Normal       | 3.5   |
| C08          | Normal       | 3     |
| C10          | Normal       | 4     |
| C12          | Normal       | 1     |
| C14          | Normal       | 4     |
| C16          | Normal       | 3     |
| C18          | Normal       | 1.5   |
| D02          | Normal       | 2     |
| D04          | Normal       | 1     |
| D06          | Normal       | 2     |
| D12          | Normal       | 1     |
| D14          | Normal       | 6     |
| D16          | Normal       | 4     |
| D18          | Normal       | 2     |
| E02          | Normal       | 2     |
| E06          | Normal       | 1.5   |
| E08          | Normal       | 2     |
| E12          | Normal       | 1.5   |
| E14          | Normal       | 1     |
| E16          | Normal       | 2     |
| E18          | Normal       | 1     |
| F02          | Normal       | 2     |
| F04          | Normal       | 6     |
| F06          | Normal       | 2     |
| F08          | Normal       | 2     |
| F10          | Normal       | 6     |
| F14          | Normal       | 1.5   |
| F16          | Normal       | 2     |
| F18          | Normal       | 2     |
| G02          | Normal       | 4     |
| G04          | Normal       | 6     |
| G06          | Normal       | 4     |
| G08          | Normal       | 1     |
| G10          | Normal       | 4     |
| G12          | Normal       | 2     |
| G14          | Normal       | 2     |
| G16          | Normal       | 1.5   |
| G18          | Normal       | 1.5   |
| H02          | Normal       | 1.5   |
| H04          | Normal       | 4     |
| H06          | Normal       | 6     |
| H08          | Normal       | 6     |
| H10          | Normal       | 6     |
| H12          | Normal       | 2     |
| H14          | Normal       | 2     |
| H16          | Normal       | 3     |
| H18          | Normal       | 6     |
| I02          | Normal       | 6     |
| I04          | Normal       | 2     |
| I06          | Normal       | 3     |
| I08          | Normal       | 1.5   |
| I10          | Normal       | 1.5   |
| I12          | Normal       | 1.5   |
| I14          | Normal       | 1.5   |
| I16          | Normal       | 2     |
| J02          | Normal       | 1.5   |
| J04          | Normal       | 3     |
| J06          | Normal       | 2.5   |
| J08          | Normal       | 1.5   |
| J10          | Normal       | 3     |
| J12          | Normal       | 2     |
| J14          | Normal       | 1.5   |
| J16          | Normal       | 2     |

Table S8 lactylation-related genes

| genes   |         |         |        |          |
|---------|---------|---------|--------|----------|
| ACTN3   | ARTN    | EXT2    | MDH1   | SAP30    |
| GATD1   | AURKA   | FAM162A | MDH2   | SDC1     |
| HAGH    | B3GALT6 | FBP2    | ME1    | SDC2     |
| HIF1A   | B3GAT1  | FKBP4   | ME2    | SDC3     |
| LDHA    | B3GAT3  | FUT8    | MED24  | SDHC     |
| LDHAL6A | B3GNT3  | G6PD    | MERTK  | SLC25A10 |
| LDHAL6B | B4GALT1 | GAL3ST1 | MET    | SLC25A13 |
| LDHB    | B4GALT2 | GALE    | MIF    | SLC35A3  |
| LDHC    | B4GALT4 | GALK1   | MIOX   | SLC37A4  |
| LDHD    | B4GALT7 | GALK2   | MPI    | SOD1     |
| MIR210  | BIK     | GAPDHS  | MXI1   | SOX9     |
| MRS2    | BPNT1   | GCLC    | NANP   | SPAG4    |
| PARK7   | CACNA1H | GFPT1   | NASP   | SRD5A3   |
| PER2    | CAPN5   | GFUS    | NDST3  | STC1     |
| PFKFB2  | CASP6   | GLCE    | NDUFV3 | STC2     |
| PNKD    | CD44    | GLRX    | NOL3   | STMN1    |
| TIGAR   | CDK1    | GMPPA   | NSDHL  | TALDO1   |
| TP53    | CENPA   | GMPPB   | NT5E   | TFF3     |
| ACACB   | CHPF    | GNE     | P4HA1  | TGFA     |
| EMB     | CHPF2   | GNPDA1  | P4HA2  | TGFBI    |
| SLC16A1 | CHST1   | GOT1    | PAM    | TKTL1    |
| SLC16A3 | CHST12  | GOT2    | PAXIP1 | TPBG     |
| SLC16A7 | CHST2   | GPC1    | PC     | TPI1     |
| SLC16A8 | CHST4   | GPC3    | PDK3   | TPST1    |
| SLC5A12 | CHST6   | GPC4    | PFKFB1 | TXN      |
| SLC5A8  | CITED2  | GPR87   | PFKP   | UGP2     |
| EP300   | CLDN3   | GUSB    | PGAM1  | VCAN     |
| CREBBP  | CLDN9   | GYS1    | PGAM2  | VEGFA    |
| KAT5    | CLN6    | GYS2    | PGK1   | VLDLR    |
| AARS2   | COG2    | HAX1    | PGLS   | XYLT2    |
| AARS1   | COL5A1  | HDLBP   | PGM2   | ZNF292   |
| KAT8    | COPB2   | HK2     | PHKA2  |          |
| KAT7    | CTH     | HMMR    | PKM    |          |
| ATAT1   | CXCR4   | HOMER1  | PKP2   |          |
| ABCB6   | CYB5A   | HS2ST1  | PLOD1  |          |
| ADORA2B | DCN     | HS6ST2  | PLOD2  |          |
| AGL     | DDIT4   | HSPA5   | PMM2   |          |
| AGRN    | DEPDC1  | IDH1    | POLR3K |          |
| AK3     | DLD     | IDUA    | PPFIA4 |          |
| AK4     | DPYSL4  | IER3    | PPIA   |          |
| AKR1A1  | DSC2    | IGFBP3  | PPP2CB |          |
| ALDH7A1 | ECD     | IL13RA1 | PRPS1  |          |
| ALDH9A1 | EFNA3   | IRS2    | PSMC4  |          |
| ALDOA   | EGFR    | ISG20   | PYGB   |          |
| ALDOB   | EGLN3   | KDELR3  | PYGL   |          |
| ALG1    | ELF3    | KIF20A  | QSOX1  |          |
| ANG     | ENO1    | KIF2A   | RARS1  |          |
| ANGPTL4 | ENO2    | LCT     | RBCK1  |          |
| ANKZF1  | ERO1A   | LHPP    | RPE    |          |
| ARPP19  | EXT1    | LHX9    | RRAGD  |          |
